# Supplementary material for: Association study and a systematic meta-analysis of the VNTR polymorphism in the 3′-UTR of dopamine transporter gene and attention-deficit hyperactivity disorder
Source: Springer Nature journal article supplement (doi:10.1007/s00702-019-01998-x), 2019-03-28
Supplement: MOESM1 [file 16581752]

## Supplementary material

### **Association study and a systematic meta-analysis of the VNTR polymorphism in the 3'-UTR of dopamine transporter gene and attention-deficit hyperactivity disorder**

Edna Grünblatt<sup>1,2,3</sup> ✉, Anna Maria Werling<sup>1</sup>, Alexander Roth<sup>1</sup>, Marcel Romanos<sup>4</sup>, Susanne Walitza<sup>1,2,3</sup>

<sup>1</sup> Department of Child and Adolescent Psychiatry and Psychotherapy, University Hospital of Psychiatry Zurich, University of Zurich, Zurich, Switzerland

<sup>2</sup> Neuroscience Center Zurich, University of Zurich and ETH Zurich, Zurich, Switzerland

<sup>3</sup> Zurich Center for Integrative Human Physiology, University of Zurich, Zurich, Switzerland

<sup>4</sup> Center of Mental Health, Department of Child and Adolescent Psychiatry, Psychosomatics and Psychotherapy, University Hospital of Wuerzburg, Würzburg, Germany

**Supplementary table S1** Quality assessment scores of each study taken into the meta-analysis (according to the Score sheet from Liu et al. (Liu et al. 2015))

A)

| Criteria                                                                                   | Cook et al. 1995 | Waldman et al. 1998 | Jiang et al. 1999 | Lunetta et al. 2000 | Swanson et al. 2000 | Curran et al. 2001 (Turkey) | Todd et al. 2001 | Maher et al. 2002 | Smith et al. 2003 | Carrasco et al. 2004 | Kustanovich et al. 2004 | Galili-Weistub et al. 2005 | Bakker et al. 2005 | Bobb et al. 2005 TDT | Feng et al. 2005 | Kim et al. 2005 | Langley et al. 2005 CC |           |
|--------------------------------------------------------------------------------------------|------------------|---------------------|-------------------|---------------------|---------------------|-----------------------------|------------------|-------------------|-------------------|----------------------|-------------------------|----------------------------|--------------------|----------------------|------------------|-----------------|------------------------|-----------|
| <b>Source of cases</b>                                                                     |                  |                     |                   |                     |                     |                             |                  |                   |                   |                      |                         |                            |                    |                      |                  |                 |                        |           |
| Selected from population or general registry (Score 3)                                     |                  |                     | 3                 |                     |                     |                             |                  | 3                 |                   |                      |                         |                            |                    |                      |                  |                 |                        |           |
| Selected from hospital (Score 2)                                                           | 2                | 2                   |                   |                     | 2                   | 2                           | 2                |                   | 2                 | 2                    | 2                       | 2                          | 2                  | 2                    | 2                | 2               | 2                      | 2         |
| Selected from pathology archives, but without description (Score 1)                        |                  |                     |                   |                     |                     |                             |                  |                   |                   |                      |                         |                            |                    |                      |                  |                 |                        |           |
| Not described (Score 0)                                                                    |                  |                     |                   | 0                   |                     |                             |                  |                   |                   |                      |                         |                            |                    |                      |                  |                 |                        |           |
| <b>Source of controls (when family study the score is automatic 3)</b>                     |                  |                     |                   |                     |                     |                             |                  |                   |                   |                      |                         |                            |                    |                      |                  |                 |                        |           |
| Population-based (Score 3)                                                                 | 3                | 3                   | 3                 | 3                   | 3                   | 3                           | 3                | 3                 |                   | 3                    | 3                       | 3                          | 3                  | 3                    | 3                | 3               | 3                      | 3         |
| Hospital-based (Score 1.5)                                                                 |                  |                     |                   |                     |                     |                             |                  |                   |                   |                      |                         |                            |                    |                      |                  |                 |                        |           |
| Not described (Score 0)                                                                    |                  |                     |                   |                     |                     |                             |                  |                   | 0                 |                      |                         |                            |                    |                      |                  |                 |                        |           |
| <b>Diagnostic criteria of ADHD</b>                                                         |                  |                     |                   |                     |                     |                             |                  |                   |                   |                      |                         |                            |                    |                      |                  |                 |                        |           |
| Acknowledged operational diagnostic criteria, such as DSM-IV, ICD-10 (Score 3)             | 3                | 3                   | 3                 | 3                   | 3                   | 3                           | 3                | 3                 |                   | 3                    | 3                       | 3                          | 3                  | 3                    | 3                | 3               | 3                      | 3         |
| Patient medical record (Score 1.5)                                                         |                  |                     |                   |                     |                     |                             |                  |                   | 1.5               |                      |                         |                            |                    |                      |                  |                 |                        |           |
| Not description (Score 0)                                                                  |                  |                     |                   |                     |                     |                             |                  |                   |                   |                      |                         |                            |                    |                      |                  |                 |                        |           |
| <b>Case-control match (when family study the score is automatic 3)</b>                     |                  |                     |                   |                     |                     |                             |                  |                   |                   |                      |                         |                            |                    |                      |                  |                 |                        |           |
| Matched by age and gender (Score 3)                                                        | 3                | 3                   | 3                 | 3                   | 3                   | 3                           | 3                | 3                 | 3                 | 3                    | 3                       | 3                          | 3                  | 3                    | 3                | 3               | 3                      | 3         |
| Matched only by age or by gender (Score 1.5)                                               |                  |                     |                   |                     |                     |                             |                  |                   |                   |                      |                         |                            |                    |                      |                  |                 |                        |           |
| Not matched or not described (Score 0)                                                     |                  |                     |                   |                     |                     |                             |                  |                   |                   |                      |                         |                            |                    |                      |                  |                 |                        | 0         |
| <b>Specimens used for determining genotypes</b>                                            |                  |                     |                   |                     |                     |                             |                  |                   |                   |                      |                         |                            |                    |                      |                  |                 |                        |           |
| Peripheral blood or buccal swabs (Score 3)                                                 | 3                | 3                   | 3                 |                     |                     |                             |                  | 3                 | 3                 | 3                    | 3                       | 3                          | 3                  | 3                    | 3                | 3               | 3                      | 3         |
| Not description (Score 0)                                                                  |                  |                     |                   | 0                   | 0                   | 0                           | 0                |                   |                   |                      |                         |                            |                    |                      |                  |                 |                        |           |
| <b>Quality control of genotyping</b>                                                       |                  |                     |                   |                     |                     |                             |                  |                   |                   |                      |                         |                            |                    |                      |                  |                 |                        |           |
| Different genotyping assays confirmed the result (Score 3)                                 | 3                |                     |                   |                     |                     |                             |                  |                   |                   |                      |                         |                            |                    |                      |                  |                 |                        |           |
| Quality control by repeated assay (Score 1.5)                                              |                  | 1.5                 |                   |                     |                     |                             |                  |                   |                   |                      |                         |                            | 1.5                |                      |                  |                 |                        |           |
| Not description (Score 0)                                                                  |                  |                     | 0                 | 0                   | 0                   | 0                           | 0                | 0                 | 0                 | 0                    | 0                       | 0                          | 1.5                | 0                    | 0                | 0               | 0                      | 0         |
| <b>Hardy-Weinberg equilibrium in controls (when family study the score is automatic 3)</b> |                  |                     |                   |                     |                     |                             |                  |                   |                   |                      |                         |                            |                    |                      |                  |                 |                        |           |
| Hardy-Weinberg equilibrium (Score 3)                                                       | 3                | 3                   | 3                 | 3                   | 3                   | 3                           | 3                | 3                 | 3                 | 3                    | 3                       | 3                          | 3                  | 3                    | 3                | 3               | 3                      | 3         |
| Hardy-Weinberg disequilibrium (Score 0)                                                    |                  |                     |                   |                     |                     |                             |                  |                   |                   |                      |                         |                            |                    |                      |                  |                 |                        |           |
| <b>Sample size</b>                                                                         |                  |                     |                   |                     |                     |                             |                  |                   |                   |                      |                         |                            |                    |                      |                  |                 |                        |           |
| ≥300 (Score 3)                                                                             |                  | 3                   |                   |                     |                     | 3                           | 3                |                   |                   |                      | 3                       |                            | 3                  | 3                    | 3                | 3               | 3                      | 3         |
| ≥200 and < 300 (Score 2)                                                                   |                  |                     | 2                 |                     |                     |                             |                  |                   |                   |                      |                         | 2                          |                    |                      |                  |                 |                        |           |
| ≥100 and < 200 (Score 1)                                                                   | 1                |                     |                   |                     |                     |                             |                  |                   | 1                 |                      |                         |                            |                    |                      |                  |                 |                        |           |
| < 100 (Score 0)                                                                            |                  |                     |                   | 0                   |                     |                             |                  | 0                 |                   | 0                    |                         |                            |                    |                      |                  |                 |                        |           |
| <b>Total (Score 0-24)</b>                                                                  | <b>21</b>        | <b>21.5</b>         | <b>20</b>         | <b>12</b>           | <b>14</b>           | <b>17</b>                   | <b>17</b>        | <b>18</b>         | <b>13.5</b>       | <b>17</b>            | <b>20</b>               | <b>19</b>                  | <b>21.5</b>        | <b>20</b>            | <b>20</b>        | <b>20</b>       | <b>20</b>              | <b>17</b> |

## B) Continue

| Criteria                                                                                   | Simsek et al. 2005 | Hawi et al. 2005 | Brookes et al. 2006 Taiwan | Brookes et al. 2006 UK | Brookes et al. 2006 IMAGE ST1 | Cheuk et al. 2006 TDT | Hebebrand et al. 2006 | Kim et al. 2006 CC | Lim et al. 2006 | Asherson et al. 2007 IMAGE ST2 | Brüggermann et al. 2007 | Olan O et al. 2007 | Genro et al. 2007 | Johansson et al. 2008 | Wang et al. 2008 | Banoei et al. 2008 | Kopeckova et al. 2008 |
|--------------------------------------------------------------------------------------------|--------------------|------------------|----------------------------|------------------------|-------------------------------|-----------------------|-----------------------|--------------------|-----------------|--------------------------------|-------------------------|--------------------|-------------------|-----------------------|------------------|--------------------|-----------------------|
| <b>Source of cases</b>                                                                     |                    |                  |                            |                        |                               |                       |                       |                    |                 |                                |                         |                    |                   |                       |                  |                    |                       |
| Selected from population or general registry (Score 3)                                     |                    |                  |                            |                        |                               |                       |                       |                    |                 |                                |                         |                    |                   | 3                     |                  |                    |                       |
| Selected from hospital (Score 2)                                                           | 2                  | 2                | 2                          | 2                      | 2                             | 2                     | 2                     | 2                  | 2               | 2                              |                         | 2                  | 2                 |                       | 2                | 2                  |                       |
| Selected from pathology archives, but without description (Score 1)                        |                    |                  |                            |                        |                               |                       |                       |                    |                 |                                |                         |                    |                   |                       |                  |                    |                       |
| Not described (Score 0)                                                                    |                    |                  |                            |                        |                               |                       |                       |                    |                 |                                | 0                       |                    |                   |                       |                  |                    | 0                     |
| <b>Source of controls (when family study the score is automatic 3)</b>                     |                    |                  |                            |                        |                               |                       |                       |                    |                 |                                |                         |                    |                   |                       |                  |                    |                       |
| Population-based (Score 3)                                                                 | 3                  | 3                | 3                          | 3                      | 3                             | 3                     | 3                     |                    | 3               | 3                              |                         | 3                  | 3                 | 3                     | 3                |                    |                       |
| Hospital-based (Score 1.5)                                                                 |                    |                  |                            |                        |                               |                       |                       | 1.5                |                 |                                |                         |                    |                   |                       |                  |                    |                       |
| Not described (Score 0)                                                                    |                    |                  |                            |                        |                               |                       |                       |                    |                 |                                | 0                       |                    |                   |                       |                  | 0                  | 0                     |
| <b>Diagnostic criteria of ADHD</b>                                                         |                    |                  |                            |                        |                               |                       |                       |                    |                 |                                |                         |                    |                   |                       |                  |                    |                       |
| Acknowledged operational diagnostic criteria, such as DSM-IV, ICD-10 (Score 3)             | 3                  | 3                | 3                          | 3                      | 3                             | 3                     | 3                     | 3                  | 3               | 3                              |                         | 3                  | 3                 | 3                     | 3                | 3                  | 3                     |
| Patient medical record (Score 1.5)                                                         |                    |                  |                            |                        |                               |                       |                       |                    |                 |                                |                         |                    |                   |                       |                  |                    |                       |
| Not description (Score 0)                                                                  |                    |                  |                            |                        |                               |                       |                       |                    |                 |                                | 0                       |                    |                   |                       |                  |                    |                       |
| <b>Case-control match (when family study the score is automatic 3)</b>                     |                    |                  |                            |                        |                               |                       |                       |                    |                 |                                |                         |                    |                   |                       |                  |                    |                       |
| Matched by age and gender (Score 3)                                                        |                    | 3                | 3                          | 3                      | 3                             | 3                     | 3                     |                    | 3               | 3                              |                         |                    | 3                 | 3                     | 3                |                    |                       |
| Matched only by age or by gender (Score 1.5)                                               | 1.5                |                  |                            |                        |                               |                       |                       | 2                  |                 |                                |                         |                    |                   |                       |                  | 1.5                | 1.5                   |
| Not matched or not described (Score 0)                                                     |                    |                  |                            |                        |                               |                       |                       |                    |                 |                                | 0                       | 0                  |                   |                       |                  |                    |                       |
| <b>Specimens used for determining genotypes</b>                                            |                    |                  |                            |                        |                               |                       |                       |                    |                 |                                |                         |                    |                   |                       |                  |                    |                       |
| Peripheral blood or buccal swabs (Score 3)                                                 | 3                  |                  |                            |                        | 3                             | 3                     |                       | 3                  | 3               |                                |                         | 3                  | 3                 | 3                     | 3                | 3                  | 3                     |
| Not description (Score 0)                                                                  |                    | 0                | 0                          | 0                      |                               |                       | 0                     |                    |                 | 0                              | 0                       |                    |                   |                       |                  |                    |                       |
| <b>Quality control of genotyping</b>                                                       |                    |                  |                            |                        |                               |                       |                       |                    |                 |                                |                         |                    |                   |                       |                  |                    |                       |
| Different genotyping assays confirmed the result (Score 3)                                 |                    |                  |                            |                        |                               |                       |                       |                    |                 |                                |                         |                    |                   |                       |                  |                    |                       |
| Quality control by repeated assay (Score 1.5)                                              |                    |                  |                            |                        |                               |                       | 1.5                   |                    |                 |                                |                         |                    |                   | 1.5                   |                  |                    |                       |
| Not description (Score 0)                                                                  | 0                  | 0                | 0                          | 0                      | 0                             | 0                     |                       | 0                  | 0               | 0                              | 0                       | 0                  | 0                 |                       | 0                | 0                  | 0                     |
| <b>Hardy-Weinberg equilibrium in controls (when family study the score is automatic 3)</b> |                    |                  |                            |                        |                               |                       |                       |                    |                 |                                |                         |                    |                   |                       |                  |                    |                       |
| Hardy-Weinberg equilibrium (Score 3)                                                       | 3                  | 3                | 3                          | 3                      | 3                             | 3                     | 3                     | 3                  | 3               | 3                              |                         |                    | 3                 | 3                     | 3                | 3                  | 3                     |
| Hardy-Weinberg disequilibrium (Score 0)                                                    |                    |                  |                            |                        |                               |                       |                       |                    |                 |                                | 0                       | 0                  |                   |                       |                  |                    |                       |
| <b>Sample size</b>                                                                         |                    |                  |                            |                        |                               |                       |                       |                    |                 |                                |                         |                    |                   |                       |                  |                    |                       |
| ≥300 (Score 3)                                                                             |                    | 3                | 3                          | 3                      | 3                             |                       | 3                     |                    |                 | 3                              |                         | 3                  | 3                 | 3                     |                  |                    |                       |
| ≥200 and < 300 (Score 2)                                                                   | 2                  |                  |                            |                        |                               |                       |                       |                    |                 |                                | 2                       |                    |                   |                       |                  | 2                  | 2                     |
| ≥100 and < 200 (Score 1)                                                                   |                    |                  |                            |                        |                               | 1                     |                       | 1                  |                 |                                |                         |                    |                   |                       | 1                |                    |                       |
| < 100 (Score 0)                                                                            |                    |                  |                            |                        |                               |                       |                       |                    | 0               |                                |                         |                    |                   |                       |                  |                    |                       |
| <b>Total (Score 0-24)</b>                                                                  | 17.5               | 17               | 17                         | 17                     | 20                            | 18                    | 18.5                  | 15.5               | 17              | 17                             | 2                       | 14                 | 20                | 22.5                  | 18               | 14.5               | 12.5                  |

C) Continue

| Criteria                                                                                   | Franke et al. 2008 | Niederhofer et al. 2008 | Kereszturi et al. 2008 | Gizer (Mick) et al. 2009 | Wohl M et al. 2008 | Martinez-Levy GA et al. 2009 | Hawi et al. 2010 (IMAGE) | Hawi et al. 2010 (English 3) | Hawi et al. 2010 (Irish 2) | Hawi et al. 2010 (Irish 1) | Dresler et al. 2010 | Franke et al. 2010 (German) | Franke et al. 2010 (Norway) | Franke et al. 2010 (Spanish) | Aparacida da Silva et al. 2011 | Bidwell et al. 2011 | Das et al. 2011 (CC) | Das et al. 2011 (TDT) |
|--------------------------------------------------------------------------------------------|--------------------|-------------------------|------------------------|--------------------------|--------------------|------------------------------|--------------------------|------------------------------|----------------------------|----------------------------|---------------------|-----------------------------|-----------------------------|------------------------------|--------------------------------|---------------------|----------------------|-----------------------|
| <b>Source of cases</b>                                                                     |                    |                         |                        |                          |                    |                              |                          |                              |                            |                            |                     |                             |                             |                              |                                |                     |                      |                       |
| Selected from population or general registry (Score 3)                                     |                    |                         |                        |                          |                    |                              |                          |                              |                            |                            |                     |                             | 3                           |                              |                                | 3                   |                      |                       |
| Selected from hospital (Score 2)                                                           | 2                  |                         | 2                      | 2                        | 2                  | 3                            | 2                        | 2                            | 2                          | 2                          | 2                   | 2                           |                             | 2                            | 2                              |                     | 2                    | 2                     |
| Selected from pathology archives, but without description (Score 1)                        |                    |                         |                        |                          |                    |                              |                          |                              |                            |                            |                     |                             |                             |                              |                                |                     |                      |                       |
| Not described (Score 0)                                                                    |                    | 0                       |                        |                          |                    |                              |                          |                              |                            |                            |                     |                             |                             |                              |                                |                     |                      |                       |
| <b>Source of controls (when family study the score is automatic 3)</b>                     |                    |                         |                        |                          |                    |                              |                          |                              |                            |                            |                     |                             |                             |                              |                                |                     |                      |                       |
| Population-based (Score 3)                                                                 | 3                  | 3                       | 3                      | 3                        | 3                  | 3                            | 3                        | 3                            | 3                          | 3                          | 3                   | 3                           | 3                           | 3                            | 3                              | 3                   | 3                    | 3                     |
| Hospital-based (Score 1.5)                                                                 |                    |                         |                        |                          |                    |                              |                          |                              |                            |                            |                     |                             |                             |                              |                                |                     |                      |                       |
| Not described (Score 0)                                                                    |                    |                         |                        |                          |                    |                              |                          |                              |                            |                            |                     |                             |                             |                              |                                |                     | 0                    |                       |
| <b>Diagnostic criteria of ADHD</b>                                                         |                    |                         |                        |                          |                    |                              |                          |                              |                            |                            |                     |                             |                             |                              |                                |                     |                      |                       |
| Acknowledged operational diagnostic criteria, such as DSM-IV, ICD-10 (Score 3)             | 3                  | 3                       | 3                      | 3                        | 3                  | 3                            | 3                        | 3                            | 3                          | 3                          | 3                   | 3                           | 3                           | 3                            | 3                              | 3                   | 3                    | 3                     |
| Patient medical record (Score 1.5)                                                         |                    |                         |                        |                          |                    |                              |                          |                              |                            |                            |                     |                             |                             |                              |                                |                     |                      |                       |
| Not description (Score 0)                                                                  |                    |                         |                        |                          |                    |                              |                          |                              |                            |                            |                     |                             |                             |                              |                                |                     |                      |                       |
| <b>Case-control match (when family study the score is automatic 3)</b>                     |                    |                         |                        |                          |                    |                              |                          |                              |                            |                            |                     |                             |                             |                              |                                |                     |                      |                       |
| Matched by age and gender (Score 3)                                                        |                    | 3                       | 3                      | 3                        | 3                  | 3                            | 3                        | 3                            | 3                          | 3                          | 3                   |                             |                             |                              | 3                              | 3                   |                      | 3                     |
| Matched only by age or by gender (Score 1.5)                                               | 1.5                |                         |                        |                          |                    |                              |                          |                              |                            |                            |                     |                             |                             |                              |                                |                     |                      |                       |
| Not matched or not described (Score 0)                                                     |                    |                         |                        |                          |                    |                              |                          |                              |                            |                            |                     | 0                           | 0                           | 0                            |                                |                     | 0                    |                       |
| <b>Specimens used for determining genotypes</b>                                            |                    |                         |                        |                          |                    |                              |                          |                              |                            |                            |                     |                             |                             |                              |                                |                     |                      |                       |
| Peripheral blood or buccal swabs (Score 3)                                                 |                    | 3                       | 3                      |                          |                    | 3                            |                          |                              |                            |                            | 3                   | 3                           | 3                           |                              | 3                              | 3                   | 3                    | 3                     |
| Not description (Score 0)                                                                  | 0                  |                         |                        | 0                        | 0                  |                              | 0                        | 0                            | 0                          | 0                          |                     |                             |                             | 0                            |                                |                     |                      |                       |
| <b>Quality control of genotyping</b>                                                       |                    |                         |                        |                          |                    |                              |                          |                              |                            |                            |                     |                             |                             |                              |                                |                     |                      |                       |
| Different genotyping assays confirmed the result (Score 3)                                 |                    |                         |                        |                          |                    |                              |                          |                              |                            |                            |                     | 3                           | 3                           | 3                            |                                |                     |                      |                       |
| Quality control by repeated assay (Score 1.5)                                              | 1.5                |                         |                        |                          |                    | 1.5                          |                          |                              |                            |                            |                     |                             |                             |                              |                                |                     |                      |                       |
| Not description (Score 0)                                                                  |                    | 0                       | 0                      | 0                        | 0                  |                              | 0                        | 0                            | 0                          | 0                          | 0                   |                             |                             |                              | 0                              | 0                   | 0                    | 0                     |
| <b>Hardy-Weinberg equilibrium in controls (when family study the score is automatic 3)</b> |                    |                         |                        |                          |                    |                              |                          |                              |                            |                            |                     |                             |                             |                              |                                |                     |                      |                       |
| Hardy-Weinberg equilibrium (Score 3)                                                       | 3                  |                         | 3                      | 3                        | 3                  | 3                            | 3                        | 3                            | 3                          | 3                          | 3                   | 3                           | 3                           | 3                            | 3                              |                     | 3                    | 3                     |
| Hardy-Weinberg disequilibrium (Score 0)                                                    |                    | 0                       |                        |                          |                    |                              |                          |                              |                            |                            |                     |                             |                             |                              |                                | 0                   |                      |                       |
| <b>Sample size</b>                                                                         |                    |                         |                        |                          |                    |                              |                          |                              |                            |                            |                     |                             |                             |                              |                                |                     |                      |                       |
| ≥300 (Score 3)                                                                             | 3                  |                         | 3                      | 3                        | 3                  |                              | 3                        |                              |                            | 3                          |                     | 3                           | 3                           | 3                            | 3                              | 3                   |                      | 3                     |
| ≥200 and < 300 (Score 2)                                                                   |                    |                         |                        |                          |                    | 2                            |                          | 2                            |                            |                            | 2                   |                             |                             |                              |                                |                     |                      | 2                     |
| ≥100 and < 200 (Score 1)                                                                   |                    | 1                       |                        |                          |                    |                              |                          |                              | 1                          |                            |                     |                             |                             |                              |                                |                     |                      |                       |
| < 100 (Score 0)                                                                            |                    |                         |                        |                          |                    |                              |                          |                              |                            |                            |                     |                             |                             |                              |                                |                     |                      |                       |
| <b>Total (Score 0-24)</b>                                                                  | <b>17</b>          | <b>13</b>               | <b>20</b>              | <b>17</b>                | <b>17</b>          | <b>21.5</b>                  | <b>17</b>                | <b>16</b>                    | <b>15</b>                  | <b>17</b>                  | <b>19</b>           | <b>20</b>                   | <b>21</b>                   | <b>17</b>                    | <b>20</b>                      | <b>18</b>           | <b>13</b>            | <b>20</b>             |

## D) Continue

| Criteria                                                                                   | El-Tarras et al. 2012 | Hoogman et al. 2013 (IMpACT) | Martínez-Levy GA et al. 2013 | de Azeredo et al. 2014 | Shang CY et al. 2014 | Hasler et al. 2015 | Sery et al. 2015 | Fonseca et al. 2015 TDT | Agudelo et al. 2015 | Gomez-Sanchez et al. 2016 | Onnink et al. 2016 (NeuroIMAGE) | Onnink et al. 2016 (IMpACT+BIG) | Ortega-Rojas et al. 2017 | Stanley et al. 2017 | Wiguna et al. 2017 | Hong et al. 2018 | Morgan et al. 2018 | Grünblatt et al CC | Grünblatt et al TDT |
|--------------------------------------------------------------------------------------------|-----------------------|------------------------------|------------------------------|------------------------|----------------------|--------------------|------------------|-------------------------|---------------------|---------------------------|---------------------------------|---------------------------------|--------------------------|---------------------|--------------------|------------------|--------------------|--------------------|---------------------|
| <b>Source of cases</b>                                                                     |                       |                              |                              |                        |                      |                    |                  |                         |                     |                           |                                 |                                 |                          |                     |                    |                  |                    |                    |                     |
| Selected from population or general registry (Score 3)                                     |                       |                              | 3                            |                        |                      |                    |                  |                         | 3                   |                           | 3                               | 3                               |                          |                     |                    |                  |                    |                    |                     |
| Selected from hospital (Score 2)                                                           | 2                     | 2                            |                              | 2                      | 2                    | 2                  | 2                |                         |                     | 2                         |                                 |                                 | 2                        | 2                   | 2                  | 2                | 2                  | 2                  | 2                   |
| Selected from pathology archives, but without description (Score 1)                        |                       |                              |                              |                        |                      |                    |                  |                         |                     |                           |                                 |                                 |                          |                     |                    |                  |                    |                    |                     |
| Not described (Score 0)                                                                    |                       |                              |                              |                        |                      |                    |                  | 0                       |                     |                           |                                 |                                 |                          |                     |                    |                  |                    |                    |                     |
| <b>Source of controls (when family study the score is automatic 3)</b>                     |                       |                              |                              |                        |                      |                    |                  |                         |                     |                           |                                 |                                 |                          |                     |                    |                  |                    |                    |                     |
| Population-based (Score 3)                                                                 |                       | 3                            | 3                            |                        | 3                    | 3                  | 3                |                         | 3                   | 3                         | 3                               | 3                               | 3                        |                     | 3                  | 3                | 3                  | 3                  | 3                   |
| Hospital-based (Score 1.5)                                                                 | 1.5                   |                              |                              | 1.5                    |                      |                    |                  |                         |                     |                           |                                 |                                 |                          | 1.5                 |                    |                  |                    |                    |                     |
| Not described (Score 0)                                                                    |                       |                              |                              |                        |                      |                    |                  | 0                       |                     |                           |                                 |                                 |                          |                     |                    |                  |                    |                    |                     |
| <b>Diagnostic criteria of ADHD</b>                                                         |                       |                              |                              |                        |                      |                    |                  |                         |                     |                           |                                 |                                 |                          |                     |                    |                  |                    |                    |                     |
| Acknowledged operational diagnostic criteria, such as DSM-IV, ICD-10 (Score 3)             | 3                     | 3                            | 3                            | 3                      | 3                    | 3                  | 3                | 3                       | 3                   | 3                         | 3                               | 3                               | 3                        | 3                   | 3                  | 3                | 3                  | 3                  | 3                   |
| Patient medical record (Score 1.5)                                                         |                       |                              |                              |                        |                      |                    |                  |                         |                     |                           |                                 |                                 |                          |                     |                    |                  |                    |                    |                     |
| Not description (Score 0)                                                                  |                       |                              |                              |                        |                      |                    |                  |                         |                     |                           |                                 |                                 |                          |                     |                    |                  |                    |                    |                     |
| <b>Case-control match (when family study the score is automatic 3)</b>                     |                       |                              |                              |                        |                      |                    |                  |                         |                     |                           |                                 |                                 |                          |                     |                    |                  |                    |                    |                     |
| Matched by age and gender (Score 3)                                                        |                       | 3                            |                              |                        | 3                    |                    | 3                | 3                       |                     | 3                         | 3                               | 3                               | 3                        |                     | 3                  | 3                |                    | 3                  | 3                   |
| Matched only by age or by gender (Score 1.5)                                               |                       |                              |                              | 1.5                    |                      | 1.5                |                  |                         |                     |                           |                                 |                                 |                          | 1.5                 |                    |                  | 1.5                |                    |                     |
| Not matched or not described (Score 0)                                                     | 0                     |                              | 0                            |                        |                      |                    |                  |                         | 0                   |                           |                                 |                                 |                          |                     |                    |                  |                    |                    |                     |
| <b>Specimens used for determining genotypes</b>                                            |                       |                              |                              |                        |                      |                    |                  |                         |                     |                           |                                 |                                 |                          |                     |                    |                  |                    |                    |                     |
| Peripheral blood or buccal swabs (Score 3)                                                 | 3                     | 3                            | 3                            | 3                      |                      | 3                  | 3                | 3                       | 3                   | 3                         | 3                               | 3                               | 3                        | 3                   | 3                  | 3                | 3                  | 3                  | 3                   |
| Not description (Score 0)                                                                  |                       |                              |                              |                        | 0                    |                    |                  |                         |                     |                           |                                 |                                 |                          |                     |                    |                  |                    |                    |                     |
| <b>Quality control of genotyping</b>                                                       |                       |                              |                              |                        |                      |                    |                  |                         |                     |                           |                                 |                                 |                          |                     |                    |                  |                    |                    |                     |
| Different genotyping assays confirmed the result (Score 3)                                 |                       |                              |                              |                        |                      | 3                  |                  |                         |                     |                           |                                 |                                 |                          | 3                   |                    |                  |                    |                    |                     |
| Quality control by repeated assay (Score 1.5)                                              |                       |                              |                              |                        |                      |                    |                  | 1.5                     |                     |                           |                                 |                                 |                          |                     |                    |                  |                    | 1.5                | 1.5                 |
| Not description (Score 0)                                                                  | 0                     | 0                            | 0                            | 0                      | 0                    |                    | 0                | 0                       |                     | 0                         | 0                               | 0                               | 0                        |                     | 0                  | 0                | 0                  |                    |                     |
| <b>Hardy-Weinberg equilibrium in controls (when family study the score is automatic 3)</b> |                       |                              |                              |                        |                      |                    |                  |                         |                     |                           |                                 |                                 |                          |                     |                    |                  |                    |                    |                     |
| Hardy-Weinberg equilibrium (Score 3)                                                       |                       |                              | 3                            | 3                      | 3                    |                    |                  | 3                       | 3                   | 3                         | 3                               | 3                               |                          |                     | 3                  |                  | 3                  | 3                  | 3                   |
| Hardy-Weinberg disequilibrium (Score 0)                                                    | 0                     | 0                            |                              |                        |                      | 0                  | 0                |                         |                     |                           |                                 |                                 | 0                        | 0                   |                    | 0                |                    |                    |                     |
| <b>Sample size</b>                                                                         |                       |                              |                              |                        |                      |                    |                  |                         |                     |                           |                                 |                                 |                          |                     |                    |                  |                    |                    |                     |
| ≥300 (Score 3)                                                                             |                       |                              | 3                            | 3                      | 3                    | 3                  | 3                |                         |                     | 3                         | 3                               | 3                               |                          |                     |                    | 3                |                    | 3                  | 3                   |
| ≥200 and < 300 (Score 2)                                                                   | 2                     |                              |                              |                        |                      |                    |                  | 2                       |                     |                           |                                 |                                 | 2                        |                     |                    |                  | 2                  |                    |                     |
| ≥100 and < 200 (Score 1)                                                                   |                       | 1                            |                              |                        |                      |                    |                  |                         | 1                   |                           |                                 |                                 |                          |                     |                    |                  |                    |                    |                     |
| < 100 (Score 0)                                                                            |                       |                              |                              |                        |                      |                    |                  |                         |                     |                           |                                 |                                 |                          | 0                   | 0                  |                  |                    |                    |                     |
| <b>Total (Score 0-24)</b>                                                                  | <b>11.5</b>           | <b>15</b>                    | <b>18</b>                    | <b>17</b>              | <b>17</b>            | <b>18.5</b>        | <b>17</b>        | <b>14</b>               | <b>17.5</b>         | <b>20</b>                 | <b>21</b>                       | <b>21</b>                       | <b>16</b>                | <b>14</b>           | <b>17</b>          | <b>17</b>        | <b>17.5</b>        | <b>21.5</b>        | <b>21.5</b>         |

**Supplementary table S4** Excluded studies in the *DATI* 3'-UTR VNTR meta-analyses and reasons for the exclusion

| Serial No. | References                                                    | Reasons                                                                                                |
|------------|---------------------------------------------------------------|--------------------------------------------------------------------------------------------------------|
| 1          | (Gill et al. 1997)                                            | Excluded as the cohort was enlarged in Daly et al. 1999                                                |
| 2          | (Daly et al. 1999)                                            | Excluded as the cohort was enlarged in Hawi et al. 2003                                                |
| 3          | (Palmer et al. 1999)                                          | Excluded as the cohort was enlarged in Kustanovich et al. 2004                                         |
| 4          | (Holmes et al. 2000)                                          | Excluded as the cohort was enlarged in Langley et al. 2005                                             |
| 5          | (Barr et al. 2001)                                            | Excluded as the cohort was enlarged in Feng et al. 2005                                                |
| 6          | (Curran et al. 2001)- <b>only the UK population</b>           | Excluded as the UK cohort was enlarged in Brookes et al. 2006                                          |
| 7          | (Roman et al. 2001)                                           | Excluded as the cohort was enlarged in Genro et al. 2007                                               |
| 8          | (Rowe et al. 2001)                                            | Excluded as the sample has no diagnose for ADHD (retrospective)                                        |
| 9          | (Kirley et al. 2002)                                          | Excluded as the cohort already reported in Daly et al. 1999                                            |
| 10         | (DiMaio et al. 2003)                                          | Excluded as only a review                                                                              |
| 11         | (Chen et al. 2003)                                            | Excluded as the cohort was enlarged in Brookes et al. 2006                                             |
| 12         | (Hawi et al. 2003)                                            | Excluded as the cohort was enlarged in Hawi et al. 2005                                                |
| 13         | (Qian et al. 2004)                                            | Excluded as no info was available from authors and the cohort was enlarged in Qian et al. 2007         |
| 14         | (Wang et al. 2004)                                            | Excluded as the cohort was already published in Wang et al. 2008                                       |
| 15         | (Purper-Ouakil et al. 2005)                                   | Excluded as is a meta-analysis without any original unpublished data                                   |
| 16         | (Bobb et al. 2005)- <b>only case-control</b>                  | Excluded as the Cases are already in TDT                                                               |
| 17         | (Cornish et al. 2005)                                         | Excluded as related only to epidemiological samples with no DSM or ICD diagnosis                       |
| 18         | (Langley et al. 2005)- <b>only the FBAT sample</b>            | Excluded as cases already included in the case-control and in FBAT no information to OR was available  |
| 19         | (Todd et al. 2005)                                            | Excluded as the cohort was already published in Kustanovich 2004, Palmer 1999 Todd 2001                |
| 20         | (Cheuk et al. 2006)- <b>only case-control</b>                 | Excluded as the Cases are already in TDT                                                               |
| 21         | (Kim et al. 2006)- <b>only the TDT sample</b>                 | Excluded as did not get any info from authors while the Cases are already in TDT                       |
| 22         | (Carrasco et al. 2006)                                        | Excluded as the cohort was the same as in Carrasco et al. 2004                                         |
| 23         | (Li et al. 2006)                                              | Excluded as is a meta-analysis without any original unpublished data                                   |
| 24         | (Yang et al. 2007)                                            | Excluded as is a meta-analysis without any original unpublished data                                   |
| 25         | (Das and Mukhopadhyay 2007)                                   | Excluded as the cohort was enlarged in Das et al. 2011                                                 |
| 26         | (Nyman et al. 2007)                                           | Excluded as No response from any of the authors                                                        |
| 27         | (Kereszturi et al. 2008)- <b>only case-control</b>            | Excluded as the Cases are already in TDT, as well as controls were unmatched                           |
| 28         | (Langley et al. 2009)                                         | Excluded as the sample already described in Langley et al. 2005                                        |
| 29         | (Franke et al. 2010)- <b>only Brüggeman and Dutch samples</b> | Excluded as already described in Brüggemann 2007, as well as in Franke et al. 2008                     |
| 30         | (Costa et al. 2011)                                           | Excluded as related only to dopamine binding                                                           |
| 31         | (Brown et al. 2011)                                           | Excluded due to failing information not possible to extract as first and last author are not available |
| 32         | (Shang et al. 2011)                                           | Excluded as cohort was enlarged in Shang et al. 2014                                                   |
| 33         | (Spencer et al. 2013)                                         | Fischman passed away, while the others claimed not to have the data (Spencer could not be reached)     |
| 34         | (Faraone et al. 2014)                                         | Excluded as describes meta-analysis with PET and SPECT                                                 |

|    |                         |                                                                                                                 |
|----|-------------------------|-----------------------------------------------------------------------------------------------------------------|
| 35 | (Kambeitz et al. 2014)  | Excluded as describes meta-analysis of <i>DATI</i> 3'-UTR VNTR and methylphenidate response                     |
| 36 | (van Rooij et al. 2015) | Excluded as most likely is the same sample as in Onnink et al 2016                                              |
| 37 | (Gatt et al. 2015)      | Excluded as only a review                                                                                       |
| 38 | (Ettinger et al. 2016)  | Excluded as described meta-analysis between <i>DATI</i> 3'-UTR VNTR and cognition without diagnosis information |
| 39 | (Bonvicini et al. 2016) | Excluded as describes only meta-analysis in adults ADHD without original unpublished data                       |
| 40 | (Soleimani et al. 2018) | Excluded as describes meta-analysis of <i>DATI</i> 3'-UTR VNTR and methylphenidate response                     |
| 41 | (Adriani et al. 2018)   | Excluded as related only to methylation data                                                                    |

**Supplementary table S5** Characteristics of included studies in the *DAT1* 3'-UTR VNTR meta-analyses

| Serial No. | Reference                     | Country [ethnicity]               | Study design | ADHD [Child-adolescent/ Adult]                 | Diagnostic criteria        | Case/control [family] | Quality score** | HWE  |
|------------|-------------------------------|-----------------------------------|--------------|------------------------------------------------|----------------------------|-----------------------|-----------------|------|
| 1          | (Cook et al. 1995)            | USA (83% Caucasian)               | HHRR         | Children                                       | DSM-III-R                  | [49]                  | 21              | n.a. |
| 2          | (Waldman et al. 1998)         | USA (68% Caucasian)               | TDT          | Children                                       | DSM-IV                     | [117]                 | 21.5            | yes  |
| 3          | (Jiang et al. 1999)           | Chinese                           | HRR          | Children                                       | DSM-III-R                  | [74]                  | 20              | yes  |
| 4          | (Lunetta et al. 2000)         | USA                               | TDT          | Children                                       | DSM-IV                     | [35]                  | 12              | n.a. |
| 5          | (Swanson et al. 2000)         | USA                               | HRR          | Children                                       | DSM-IV                     | [80]                  | 14              | n.a. |
| 6          | (Curran et al. 2001)          | Turkey                            | TDT          | Children                                       | DSM-IV                     | [111]                 | 17              | n.a. |
| 7          | (Todd et al. 2001)            | USA                               | TDT          | Children                                       | DSM-IV                     | [523]                 | 17              | n.a. |
| 8          | (Maher et al. 2002)           | USA Caucasian (males)             | TDT          | Children                                       | DSM-III-R                  | [33]                  | 18              | n.a. |
| 9          | (Smith et al. 2003)           | USA Caucasian                     | CC           | Children                                       | Semi DSM-IV                | 105/68                | 13.5            | yes  |
| 10         | (Carrasco et al. 2004)        | Chile                             | HHRR         | Children                                       | DSM-IV                     | [26]                  | 17              | n.a. |
| 11         | (Kustanovich et al. 2004)     | USA (79% Caucasian)               | TDT          | Children                                       | DSM-IV                     | [293]                 | 20              | n.a. |
| 12         | (Galili-Weisstub et al. 2005) | Jewish                            | HRR          | Children                                       | DSM-IV                     | [68]                  | 19              | n.a. |
| 13         | (Bakker et al. 2005)          | Dutch                             | TDT          | Children                                       | DSM-IV                     | [236]                 | 21.5            | yes  |
| 14         | (Bobb et al. 2005)            | USA (75% Caucasian)               | TDT          | Children                                       | DSM-IV                     | [163]                 | 20              | yes  |
| 15         | (Feng et al. 2005)            | Canada                            | TDT          | Children                                       | DSM-IV                     | [178]                 | 20              | n.a. |
| 16         | (Kim et al. 2005)             | Korea                             | TDT          | Children                                       | DSM-IV                     | [107]                 | 20              | yes  |
| 17         | (Langley et al. 2005)         | UK (White British)                | CC           | Children                                       | ICD-10, DSM-IV & DSM-III-R | 259/278               | 17              | yes  |
| 18         | (Simsek et al. 2005)          | Oman                              | CC           | Children                                       | DSM-IV                     | 92/110                | 17.5            | yes  |
| 19         | (Hawi et al. 2005)            | Ireland                           | TDT          | Children                                       | DSM-IV                     | [179]                 | 17              | n.a. |
| 20         | (Brookes et al. 2006)         | Taiwan                            | TDT          | Children                                       | DSM-IV                     | [216]                 | 17              | n.a. |
|            |                               | UK                                | TDT          | Children                                       | DSM-IV                     | [180]                 | 17              | n.a. |
|            |                               | European (ST1 IMAGE; 8 countries) | TDT          | Children                                       | DSM-IV                     | [664]                 | 20              | yes  |
| 21         | (Cheuk et al. 2006)           | Hong Kong                         | TDT          | Children                                       | DSM-IV                     | [64]                  | 18              | n.a. |
| 22         | (Hebebrand et al. 2006)       | German                            | TDT          | Children                                       | ICD10 & DSM-IV             | [102]                 | 18.5            | n.a. |
| 23         | (Kim et al. 2006)             | Korea                             | CC           | Children (Control- Mix of children and adults) | DSM-IV                     | 85/100                | 15.5            | yes  |
| 24         | (Lim et al. 2006)             | Korea                             | HHRR         | Children                                       | DSM-IV                     | [33]                  | 17              | n.a. |



|    |                                  |                                   |      |                   |                    |         |      |      |
|----|----------------------------------|-----------------------------------|------|-------------------|--------------------|---------|------|------|
| 25 | (Asherson et al. 2007)           | European (ST2 IMAGE; 8 countries) | TDT  | Children          | DSM-IV             | [998]   | 17   | n.a. |
| 26 | (Brüggemann et al. 2007)         | German                            | CC   | Adults            | n.a.               | 122/177 | 2    | n.a. |
| 27 | (Qian et al. 2007)               | Chinese (Han)                     | CC   | Children          | DSM-IV             | 332/216 | 14   | yes  |
| 28 | (Genro et al. 2008)              | Brazil (92% Caucasian)            | TDT  | Children          | DSM-IV             | [241]   | 20   | yes  |
| 29 | (Johansson et al. 2008)          | Norwegian                         | CC   | Adults            | ICD-10 DSM-IV      | 358/340 | 22.5 | yes  |
| 30 | (Wang et al. 2008)               | Chinese (Han)                     | HHRR | Children          | DSM-IV             | [54]    | 18   | yes  |
| 31 | (Banoei et al. 2008)             | Iran                              | CC   | Children          | DSM-IV             | 100/130 | 14.5 | yes  |
| 32 | (Kopeckova et al. 2008)          | Czech                             | CC   | Children          | DSM-IV             | 100/100 | 12.5 | yes  |
| 33 | (Franke et al. 2008)             | Dutch                             | CC   | Adults            | DSM-IV             | 213/507 | 17   | yes  |
| 34 | (Niederhofer et al. 2008)        | European (German/Austria)         | HRR  | Children          | DSM-IV             | [49]    | 13   | n.a. |
| 35 | (Kereszturi et al. 2008)         | Hungarian                         | TDT  | Children          | DSM-IV             | [168]   | 20   | yes  |
| 36 | (Gizer et al. 2009)              | USA (97% Caucasian)               | TDT  | Children & Adults | DSM-III-R / DSM-IV | [266]   | 17   | n.a. |
| 37 | (Wohl et al. 2008)               | French (86% Caucasian)            | TDT  | Children          | DSM-IV TR          | [146]   | 17   | n.a. |
| 38 | (Martinez-Levy et al. 2009)      | Mexico                            | CC   | Children          | ICD-10, DSM-IV-R   | 105/113 | 21.5 | yes  |
| 39 | (Hawi et al. 2010)               | IMAGE (European)                  | TDT  | Children          | DSM-IV             | [1033]  | 17   | n.a. |
|    |                                  | English                           | TDT  | Children          | DSM-IV             | [107]   | 16   | n.a. |
|    |                                  | Irish (2)                         | TDT  | Children          | DSM-IV             | [52]    | 15   | n.a. |
|    |                                  | Irish (1)                         | TDT  | Children          | DSM-IV             | [178]   | 17   | n.a. |
| 40 | (Dresler et al. 2010)            | German                            | CC   | Adults            | DSM-IV             | 161/109 | 19   | n.a. |
| 41 | (Franke et al. 2010)             | German                            | CC   | Adults            | DSM-IV             | 421/405 | 20   | yes  |
|    |                                  | Norwegian                         | CC   | Adults            | DSM-IV             | 450/548 | 21   | yes  |
|    |                                  | Spanish (Caucasian)               | CC   | Adults            | DSM-IV             | 264/195 | 17   | yes  |
| 42 | (Aparecida da Silva et al. 2011) | Brazil                            | CC   | Adults            | DSM-IV             | 102/479 | 20   | yes  |
| 43 | (Bidwell et al. 2011)            | USA                               | HHRR | Children          | DSM-IV             | [202]   | 18   | n.a. |

|    |                             |                     |     |                         |                        |              |      |      |
|----|-----------------------------|---------------------|-----|-------------------------|------------------------|--------------|------|------|
| 44 | (Das et al. 2011)           | India               | CC  | Children (Control- Mix) | DSM-IV                 | 125/93       | 13   | yes  |
|    |                             | India               | TDT | Children                | DSM-IV                 | [122]        | 20   | yes  |
| 45 | (El-Tarras et al. 2012)     | Saudi               | CC  | Children                | DSM-IV                 | 120/160      | 11.5 | n.a. |
| 46 | (Hoogman et al. 2013)       | Dutch               | CC  | Adults                  | DSM-IV                 | 87/77        | 15   | n.a. |
| 47 | (Martinez-Levy et al. 2013) | Mexico              | CC  | Children                | ICD-10, DSM-IV         | 215/283      | 18   | yes  |
| 48 | (de Azeredo et al. 2014)    | Brazil (European)   | CC  | Adults                  | DSM-IV                 | 476/587      | 17   | yes  |
| 49 | (Shang and Gau 2014)        | Taiwan              | TDT | Children                | DSM-IV                 | [382]        | 17   | yes  |
| 50 | (Hasler et al. 2015)        | European (Swiss)    | CC  | Adults                  | DSM-IV TR              | 75/391       | 18.5 | n.a. |
| 51 | (Sery et al. 2015)          | Czech               | CC  | Children                | ICD-10, DSM-IV         | 218/253      | 17   | n.a. |
| 52 | (Fonseca et al. 2015)       | Columbia            | TDT | Children                | DSM-IV                 | [86]         | 14   | yes  |
| 53 | (Agudelo et al. 2015)       | Columbia            | CC  | Children                | DSM-IV                 | 70/53        | 17.5 | yes  |
| 54 | (Gomez-Sanchez et al. 2016) | Spanish             | CC  | Children                | DSM-IV TR              | 290/340      | 20   | yes  |
| 55 | (Onnink et al. 2016)        | Dutch (NeuroIMAGE)  | CC  | Children                | DSM-IV                 | 301/186      | 21   | yes  |
|    |                             | Dutsch (IMpACT+BIG) | CC  | Adults                  | DSM-IV                 | 118/111+1718 | 21   | yes  |
| 56 | (Ortega-Rojas et al. 2017)  | Columbia            | TDT | Children                | DSM-IV TR              | [97]         | 16   | n.a. |
| 57 | (Stanley et al. 2017)       | India               | CC  | Children                | DSM-5                  | 44/44        | 14   | n.a. |
| 58 | (Wiguna et al. 2017)        | Indonesian          | CC  | Children                | DSM-IV TR              | 47/48        | 17   | yes  |
| 59 | (Hong et al. 2018)          | Korea               | CC  | Children                | DSM-IV                 | 150/322      | 17   | n.a. |
| 60 | (Morgan et al. 2018)        | USA (53% Caucasian) | CC  | Children                | DSM-IV, DISC           | 113/99       | 17.5 | yes  |
| 61 | Current study               | Caucasian           | CC  | Children                | ICD-10, DSM-IV & DSM-5 | 220/156      | 21.5 | yes  |
|    |                             | Caucasia            | TDT | Children                | ICD-10, DSM-IV & DSM-5 | [202]        | 21.5 | yes  |

**Abbreviations:** CC, case-control study; TDT, transmission disequilibrium test; FBAT, Family Based Association Test; HRR family-based study using haplotype relative risk, HHRR, haplotype-based haplotype relative risk; n.a., not available; ADHD, attention-deficit hyperactivity disorder; DSM-IIIR/IV, diagnostic and statistical manual of mental disorders, fourth Edition/ third revised Edition; ICD-10, international classification of disease; HWE, hardy-Weinberg equilibrium; DISC, Diagnostic Interview Schedule for Children-IV.

\*\* See table Quality assessment score (Supplementary Table S3); according to the Score sheet from Liu et al. ((Liu et al. 2015) as following:

|                      |     |
|----------------------|-----|
| Low quality scores   | <16 |
| High quality scores  | >16 |
| Middle quality score | =16 |

**Supplementary table S6** Summary of all studies included in the meta analysis for the association between *DATI* 3'-UTR VNTR 10-repeat allele and 9-repeat allele.

| id | author          | year | type | N    | N Cases | OR    | CI-   | CI+    | log(or) | se    | Ancestry                          | Child/Adult |
|----|-----------------|------|------|------|---------|-------|-------|--------|---------|-------|-----------------------------------|-------------|
| 1  | Cook            | 1995 | HHRR | 147  | 49      | 2.842 | 1.324 | 6.099  | 1.045   | 0.390 | USA (83% Caucasian)               | Child       |
| 2  | Waldman         | 1998 | TDT  | 392  | 117     | 1.915 | 1.346 | 2.725  | 0.650   | 0.180 | USA (68% Caucasian)               | Child       |
| 3  | Jiang           | 1999 | HRR  | 222  | 74      | 1.070 | 0.450 | 2.530  | 0.068   | 0.440 | Chinese                           | Child       |
| 4  | Lunetta         | 2000 | TDT  | 60   | 33      | 1.700 | 0.778 | 3.713  | 0.531   | 0.399 | USA                               | Child       |
| 5  | Swanson         | 2000 | HRR  | 240  | 80      | 0.636 | 0.295 | 1.371  | -0.452  | 0.391 | USA                               | Child       |
| 6  | Curran (Turkey) | 2001 | TDT  | 333  | 111     | 0.813 | 0.533 | 1.240  | -0.208  | 0.216 | Turkey                            | Child       |
| 7  | Todd            | 2001 | TDT  | 2092 | 219     | 0.821 | 0.575 | 1.173  | -0.197  | 0.182 | USA                               | Child       |
| 8  | Maher           | 2002 | TDT  | 99   | 33      | 1.000 | 0.397 | 2.519  | 0.000   | 0.471 | Caucasian (male)                  | Child       |
| 9  | Smith           | 2003 | CC   | 173  | 105     | 0.950 | 0.580 | 1.570  | -0.051  | 0.254 | Caucasian (USA)                   | Child       |
| 10 | Carrasco        | 2004 | HHRR | 51   | 26      | 1.800 | 0.719 | 4.505  | 0.588   | 0.468 | Chile                             | Child       |
| 11 | Kustanovich     | 2004 | TDT  | 1120 | 535     | 0.915 | 0.714 | 1.174  | -0.088  | 0.127 | USA (79% Caucasian)               | Child       |
| 12 | Galili-Weisstub | 2005 | HRR  | 204  | 68      | 1.031 | 0.634 | 1.677  | 0.031   | 0.248 | Jewish                            | Child       |
| 13 | Bakker          | 2005 | TDT  | 901  | 434     | 0.944 | 0.684 | 1.304  | -0.057  | 0.165 | Dutch                             | Child       |
| 14 | Bobb            | 2005 | TDT  | 355  | 163     | 1.667 | 0.452 | 6.144  | 0.511   | 0.666 | USA (75% Caucasian)               | Child       |
| 15 | Feng            | 2005 | TDT  | 541  | 226     | 1.000 | 0.728 | 1.374  | 0.000   | 0.162 | Canada                            | Child       |
| 16 | Kim             | 2005 | TDT  | 321  | 107     | 1.063 | 0.537 | 2.103  | 0.061   | 0.348 | Korean                            | Child       |
| 17 | Langley         | 2005 | CC   | 537  | 259     | 1.047 | 0.800 | 1.380  | 0.046   | 0.139 | UK (white British)                | Child       |
| 18 | Simsek          | 2005 | CC   | 179  | 84      | 1.130 | 0.730 | 1.750  | 0.122   | 0.223 | Oman                              | Child       |
| 19 | Hawi            | 2005 | TDT  | 537  | 179     | 1.167 | 0.889 | 1.531  | 0.154   | 0.139 | Irish                             | Child       |
| 20 | Brookes         | 2006 | TDT  | 475  | 216     | 3.111 | 1.468 | 6.593  | 1.135   | 0.383 | Taiwan                            | Child       |
| 21 | Brookes         | 2006 | TDT  | 476  | 180     | 2.031 | 1.330 | 3.102  | 0.709   | 0.216 | UK                                | Child       |
| 22 | Brookes         | 2006 | TDT  | 2748 | 776     | 1.130 | 0.931 | 1.372  | 0.122   | 0.099 | European (ST1 IMAGE; 8 countries) | Child       |
| 23 | Cheuk           | 2006 | TDT  | 192  | 64      | 0.890 | 0.350 | 2.280  | -0.117  | 0.478 | Chinese (Hong Kong)               | Child       |
| 24 | Hebebrand       | 2006 | TDT  | 425  | 229     | 1.021 | 0.868 | 1.199  | 0.020   | 0.082 | German                            | Child       |
| 25 | Kim             | 2006 | CC   | 185  | 85      | 0.317 | 0.142 | 0.709  | -1.149  | 0.411 | Korean                            | Child       |
| 26 | Lim             | 2006 | HHRR | 99   | 33      | 7.880 | 2.200 | 28.290 | 2.064   | 0.652 | Korean                            | Child       |

|    |                    |      |      |      |      |       |       |       |        |       |                                   |             |
|----|--------------------|------|------|------|------|-------|-------|-------|--------|-------|-----------------------------------|-------------|
| 27 | Asherson           | 2007 | TDT  | 3352 | 1159 | 1.205 | 1.045 | 1.389 | 0.186  | 0.073 | European (ST2 IMAGE; 8 countries) | Child       |
| 28 | Brüggemann         | 2007 | CC   | 296  | 122  | 0.880 | 0.520 | 1.480 | -0.128 | 0.267 | German                            | Adults      |
| 29 | Qian Q             | 2007 | CC   | 476  | 284  | 0.660 | 0.360 | 1.210 | -0.416 | 0.309 | Chinese (Han)                     | Child       |
| 30 | Genro              | 2007 | TDT  | 689  | 241  | 1.024 | 0.759 | 1.380 | 0.023  | 0.152 | Brazil (92% Caucasian)            | Child       |
| 31 | Johansson          | 2008 | CC   | 698  | 358  | 0.940 | 0.740 | 1.190 | -0.062 | 0.121 | Norway                            | Adults      |
| 32 | Wang               | 2008 | HHRR | 111  | 51   | 1.200 | 0.370 | 3.910 | 0.182  | 0.601 | Chinese (Han)                     | Child       |
| 33 | Banoei             | 2008 | CC   | 230  | 100  | 1.078 | 0.743 | 1.565 | 0.075  | 0.190 | Iran                              | Child       |
| 34 | Kopeckova          | 2008 | CC   | 200  | 100  | 1.640 | 1.045 | 2.576 | 0.495  | 0.230 | Czech                             | Child       |
| 35 | Franke             | 2008 | CC   | 720  | 213  | 0.760 | 0.590 | 0.980 | -0.274 | 0.129 | Dutch                             | Adults      |
| 36 | Niederhofer        | 2008 | HRR  | 134  | 49   | 1.000 | 0.420 | 2.350 | 0.000  | 0.439 | German/Austria                    | Child       |
| 37 | Kereszturi         | 2008 | TDT  | 440  | 168  | 1.325 | 0.625 | 2.811 | 0.281  | 0.384 | Hungarian                         | child       |
| 38 | Gizer (Mick)       | 2009 | TDT  | 1006 | 474  | 1.036 | 0.798 | 1.345 | 0.035  | 0.133 | USA (97% Caucasian)               | Child/Adult |
| 39 | Wohl M             | 2008 | TDT  | 398  | 146  | 1.000 | 1.000 | 1.000 | 0.000  | 0.080 | French (86% Caucasian)            | Child       |
| 40 | Martinez-Levy GA   | 2009 | CC   | 218  | 105  | 0.850 | 0.510 | 1.430 | -0.163 | 0.263 | Mexico                            | Child       |
| 41 | Hawi               | 2010 | TDT  | 3099 | 1033 | 1.490 | 1.200 | 1.840 | 0.399  | 0.109 | IMAGE (European)                  | Child       |
| 42 | Hawi               | 2010 | TDT  | 277  | 107  | 2.210 | 0.840 | 5.820 | 0.793  | 0.494 | English                           | Child       |
| 43 | Hawi               | 2010 | TDT  | 156  | 52   | 0.780 | 0.300 | 2.060 | -0.248 | 0.491 | Irish 2                           | Child       |
| 44 | Hawi               | 2010 | TDT  | 534  | 178  | 1.630 | 0.930 | 2.850 | 0.489  | 0.286 | Irish 1                           | Child       |
| 45 | Dresler            | 2010 | CC   | 270  | 161  | 1.040 | 0.710 | 1.530 | 0.039  | 0.196 | German (Würzburg)                 | Child       |
| 46 | Franke (IMpACT)    | 2010 | CC   | 826  | 421  | 1.010 | 0.810 | 1.260 | 0.010  | 0.113 | German (Würzburg)                 | Adults      |
| 47 | Franke (IMpACT)    | 2010 | CC   | 998  | 450  | 0.880 | 0.720 | 1.070 | -0.128 | 0.101 | Norway                            | Adults      |
| 48 | Franke (IMpACT)    | 2010 | CC   | 459  | 264  | 1.010 | 0.760 | 1.340 | 0.010  | 0.145 | Spanish (Caucasian)               | Adults      |
| 49 | Aparacida da Silva | 2011 | CC   | 555  | 99   | 1.090 | 0.770 | 1.530 | 0.086  | 0.175 | Brazil                            | Adults      |
| 50 | Bidwell            | 2011 | HHRR | 606  | 202  | 0.990 | 0.670 | 1.480 | -0.010 | 0.202 | USA                               | Child       |
| 51 | Das                | 2011 | CC   | 211  | 120  | 0.880 | 0.430 | 1.800 | -0.128 | 0.365 | Indian                            | Child       |
| 52 | Das                | 2011 | TDT  | 354  | 122  | 0.400 | 0.180 | 0.890 | -0.916 | 0.408 | Indian                            | Child       |
| 53 | El-Tarras          | 2012 | CC   | 135  | 30   | 0.670 | 0.360 | 1.270 | -0.400 | 0.322 | Saudi                             | Child       |
| 54 | Hoogman (IMpACT)   | 2013 | CC   | 160  | 83   | 0.600 | 0.360 | 0.990 | -0.511 | 0.258 | Dutch                             | Adults      |
| 55 | Martinez-Levy GA   | 2013 | CC   | 622  | 215  | 1.280 | 0.840 | 1.940 | 0.247  | 0.214 | Mexico                            | Child       |

|    |                     |      |     |      |     |       |       |        |        |       |                     |        |
|----|---------------------|------|-----|------|-----|-------|-------|--------|--------|-------|---------------------|--------|
| 56 | de Azeredo          | 2014 | CC  | 1063 | 476 | 1.040 | 0.870 | 1.260  | 0.039  | 0.094 | Brazil (European)   | Adults |
| 57 | Shang CY            | 2014 | TDT | 1298 | 439 | 1.150 | 0.750 | 1.760  | 0.140  | 0.218 | Taiwan              | Child  |
| 58 | Hasler              | 2015 | CC  | 372  | 70  | 0.900 | 0.590 | 1.370  | -0.105 | 0.215 | European (Swiss)    | Adults |
| 59 | Sery                | 2015 | CC  | 471  | 218 | 1.290 | 0.950 | 1.740  | 0.255  | 0.154 | Czech               | Child  |
| 60 | Fonseca             | 2015 | TDT | 258  | 86  | 1.412 | 0.223 | 2.252  | 0.345  | 0.590 | Columbia (Spanish)  | Child  |
| 61 | Agudelo             | 2015 | CC  | 123  | 70  | 1.060 | 0.560 | 1.980  | 0.058  | 0.322 | Columbia (Spanish)  | Child  |
| 62 | Gomez-Sanchez       | 2016 | CC  | 630  | 290 | 0.970 | 0.770 | 1.210  | -0.030 | 0.115 | Spanish (Caucasian) | Child  |
| 63 | Onnink (NeuroIMAGE) | 2016 | CC  | 471  | 294 | 1.050 | 0.760 | 1.440  | 0.049  | 0.163 | Dutch               | Child  |
| 64 | Onnink (IMpACT+BIG) | 2016 | CC  | 1894 | 115 | 0.830 | 0.610 | 1.120  | -0.186 | 0.155 | Dutch               | Adults |
| 65 | Ortega-Rojas        | 2017 | TDT | 291  | 97  | 0.787 | 0.424 | 1.471  | -0.239 | 0.317 | Columbia (Spanish)  | Child  |
| 66 | Stanley             | 2017 | CC  | 85   | 42  | 4.930 | 1.580 | 15.340 | 1.595  | 0.580 | Indian              | Child  |
| 67 | Wiguna              | 2017 | CC  | 92   | 47  | 2.400 | 1.050 | 5.460  | 0.875  | 0.421 | Indonesian          | Child  |
| 68 | Hong                | 2018 | CC  | 450  | 146 | 1.530 | 0.650 | 3.620  | 0.425  | 0.438 | Korean              | Child  |
| 69 | Morgan              | 2018 | CC  | 212  | 113 | 0.980 | 0.630 | 1.520  | -0.020 | 0.225 | 53% Caucasian       | Child  |
| 70 | Grünblatt           | 2019 | CC  | 366  | 211 | 0.676 | 0.484 | 0.945  | -0.391 | 0.171 | Caucasian (Swiss)   | Child  |
| 71 | Grünblatt           | 2019 | TDT | 719  | 314 | 1.048 | 0.742 | 1.480  | 0.047  | 0.176 | Caucasian (Swiss)   | Child  |

**Supplementary table S7** Summary of all studies included in the meta analysis for the association between *DATI* 3'-UTR VNTR Long-repeat allele and Short-repeat allele.

| id | author          | year | type | N    | N Cases | OR    | CI-   | CI+    | log(or) | se    | Ancestry                          | Child/Adult |
|----|-----------------|------|------|------|---------|-------|-------|--------|---------|-------|-----------------------------------|-------------|
| 1  | Cook            | 1995 | HHRR | 147  | 49      | 2.842 | 1.324 | 6.099  | 1.045   | 0.390 | USA (83% Caucasian)               | Child       |
| 2  | Waldman         | 1998 | TDT  | 392  | 117     | 1.915 | 1.346 | 2.725  | 0.650   | 0.180 | USA (68% Caucasian)               | Child       |
| 3  | Jiang           | 1999 | HRR  | 222  | 74      | 1.070 | 0.450 | 2.530  | 0.068   | 0.440 | Chinese                           | Child       |
| 4  | Lunetta         | 2000 | TDT  | 60   | 33      | 1.700 | 0.778 | 3.713  | 0.531   | 0.399 | USA                               | Child       |
| 5  | Swanson         | 2000 | HRR  | 240  | 80      | 0.636 | 0.295 | 1.371  | -0.452  | 0.391 | USA                               | Child       |
| 6  | Curran (Turkey) | 2001 | TDT  | 333  | 111     | 0.813 | 0.533 | 1.240  | -0.208  | 0.216 | Turkey                            | Child       |
| 7  | Todd            | 2001 | TDT  | 2092 | 219     | 0.821 | 0.575 | 1.173  | -0.197  | 0.182 | USA                               | Child       |
| 8  | Maher           | 2002 | TDT  | 99   | 33      | 1.000 | 0.397 | 2.519  | 0.000   | 0.471 | Caucasian (male)                  | Child       |
| 9  | Smith           | 2003 | CC   | 173  | 105     | 0.950 | 0.580 | 1.570  | -0.051  | 0.254 | Caucasian (USA)                   | Child       |
| 10 | Carrasco        | 2004 | HHRR | 51   | 26      | 1.800 | 0.719 | 4.505  | 0.588   | 0.468 | Chile                             | Child       |
| 11 | Kustanovich     | 2004 | TDT  | 1120 | 535     | 0.915 | 0.714 | 1.174  | -0.088  | 0.127 | USA (79% Caucasian)               | Child       |
| 12 | Galili-Weisstub | 2005 | HRR  | 204  | 68      | 0.700 | 0.360 | 1.380  | -0.357  | 0.343 | Jewish                            | Child       |
| 13 | Bakker          | 2005 | TDT  | 901  | 434     | 0.944 | 0.684 | 1.304  | -0.057  | 0.165 | Dutch                             | Child       |
| 14 | Bobb            | 2005 | TDT  | 355  | 163     | 1.667 | 0.452 | 6.144  | 0.511   | 0.666 | USA (75% Caucasian)               | Child       |
| 15 | Feng            | 2005 | TDT  | 541  | 226     | 1.030 | 0.660 | 1.600  | 0.030   | 0.226 | Canada                            | Child       |
| 16 | Kim             | 2005 | TDT  | 321  | 107     | 1.140 | 0.410 | 3.150  | 0.131   | 0.520 | Korean                            | Child       |
| 17 | Langley         | 2005 | CC   | 537  | 259     | 1.047 | 0.800 | 1.380  | 0.046   | 0.139 | UK (white British)                | Child       |
| 18 | Simsek          | 2005 | CC   | 202  | 92      | 1.060 | 0.710 | 1.600  | 0.058   | 0.207 | Oman                              | Child       |
| 19 | Hawi            | 2005 | TDT  | 537  | 179     | 1.167 | 0.889 | 1.531  | 0.154   | 0.139 | Irish                             | Child       |
| 20 | Brookes         | 2006 | TDT  | 475  | 216     | 5.320 | 1.910 | 14.770 | 1.671   | 0.522 | Taiwan                            | Child       |
| 21 | Brookes         | 2006 | TDT  | 476  | 180     | 4.320 | 2.370 | 7.890  | 1.463   | 0.307 | UK                                | Child       |
| 22 | Brookes         | 2006 | TDT  | 2748 | 776     | 1.130 | 0.931 | 1.372  | 0.122   | 0.099 | European (ST1 IMAGE; 8 countries) | Child       |
| 23 | Cheuk           | 2006 | TDT  | 192  | 64      | 0.890 | 0.350 | 2.280  | -0.117  | 0.478 | Chinese (Hong Kong)               | Child       |
| 24 | Hebebrand       | 2006 | TDT  | 425  | 229     | 1.021 | 0.868 | 1.199  | 0.020   | 0.082 | German                            | Child       |
| 25 | Kim             | 2006 | CC   | 185  | 85      | 0.400 | 0.170 | 0.910  | -0.916  | 0.428 | Korean                            | Child       |
| 26 | Lim             | 2006 | HHRR | 99   | 33      | 7.880 | 2.200 | 28.290 | 2.064   | 0.652 | Korean                            | Child       |

|    |                    |      |      |      |      |       |       |       |        |       |                                   |             |
|----|--------------------|------|------|------|------|-------|-------|-------|--------|-------|-----------------------------------|-------------|
| 27 | Asherson           | 2007 | TDT  | 3352 | 1159 | 1.450 | 1.190 | 1.770 | 0.372  | 0.101 | European (ST2 IMAGE; 8 countries) | Child       |
| 28 | Brüggemann         | 2007 | CC   | 296  | 122  | 0.880 | 0.520 | 1.480 | -0.128 | 0.267 | German                            | Adults      |
| 29 | Qian Q             | 2007 | CC   | 548  | 332  | 0.850 | 0.530 | 1.370 | -0.163 | 0.242 | Chinese (Han)                     | Child       |
| 30 | Genro              | 2007 | TDT  | 689  | 241  | 1.024 | 0.759 | 1.380 | 0.023  | 0.152 | Brazil (92% Caucasian)            | Child       |
| 31 | Johansson          | 2008 | CC   | 698  | 358  | 0.940 | 0.740 | 1.190 | -0.062 | 0.121 | Norway                            | Adults      |
| 32 | Wang               | 2008 | HHRR | 162  | 54   | 1.860 | 0.750 | 4.640 | 0.621  | 0.465 | Chinese (Han)                     | Child       |
| 33 | Banoei             | 2008 | CC   | 230  | 100  | 1.078 | 0.743 | 1.565 | 0.075  | 0.190 | Iran                              | Child       |
| 34 | Kopeckova          | 2008 | CC   | 200  | 100  | 1.640 | 1.045 | 2.576 | 0.495  | 0.230 | Czech                             | Child       |
| 35 | Franke             | 2008 | CC   | 720  | 213  | 0.760 | 0.590 | 0.980 | -0.274 | 0.129 | Dutch                             | Adults      |
| 36 | Niederhofer        | 2008 | HRR  | 134  | 49   | 1.000 | 0.420 | 2.350 | 0.000  | 0.439 | German/Austria                    | Child       |
| 37 | Kereszturi         | 2008 | TDT  | 440  | 168  | 1.060 | 0.610 | 1.860 | 0.058  | 0.284 | Hungarian                         | child       |
| 38 | Gizer (Mick)       | 2009 | TDT  | 1006 | 474  | 1.036 | 0.798 | 1.345 | 0.035  | 0.133 | USA (97% Caucasian)               | Child/Adult |
| 39 | Wohl M             | 2008 | TDT  | 398  | 146  | 1.000 | 1.000 | 1.000 | 0.000  | 0.080 | French (86% Caucasian)            | Child       |
| 40 | Martinez-Levy GA   | 2009 | CC   | 218  | 105  | 0.850 | 0.510 | 1.430 | -0.163 | 0.263 | Mexico                            | Child       |
| 41 | Hawi               | 2010 | TDT  | 3099 | 1033 | 1.430 | 1.150 | 1.760 | 0.358  | 0.109 | IMAGE (European)                  | Child       |
| 42 | Hawi               | 2010 | TDT  | 277  | 107  | 2.210 | 0.840 | 5.820 | 0.793  | 0.494 | English                           | Child       |
| 43 | Hawi               | 2010 | TDT  | 156  | 52   | 0.890 | 0.350 | 2.280 | -0.117 | 0.478 | Irish 2                           | Child       |
| 44 | Hawi               | 2010 | TDT  | 534  | 178  | 1.800 | 1.040 | 3.120 | 0.588  | 0.280 | Irish 1                           | Child       |
| 45 | Dresler            | 2010 | CC   | 270  | 161  | 1.040 | 0.710 | 1.530 | 0.039  | 0.196 | German (Würzburg)                 | Child       |
| 46 | Franke (IMpACT)    | 2010 | CC   | 826  | 421  | 1.010 | 0.810 | 1.260 | 0.010  | 0.113 | German (Würzburg)                 | Adults      |
| 47 | Franke (IMpACT)    | 2010 | CC   | 998  | 450  | 0.880 | 0.720 | 1.070 | -0.128 | 0.101 | Norway                            | Adults      |
| 48 | Franke (IMpACT)    | 2010 | CC   | 459  | 264  | 1.010 | 0.760 | 1.340 | 0.010  | 0.145 | Spanish (Caucasian)               | Adults      |
| 49 | Aparacida da Silva | 2011 | CC   | 581  | 102  | 1.150 | 0.810 | 1.620 | 0.140  | 0.177 | Brazil                            | Adults      |
| 50 | Bidwell            | 2011 | HHRR | 606  | 202  | 0.990 | 0.670 | 1.480 | -0.010 | 0.202 | USA                               | Child       |
| 51 | Das                | 2011 | CC   | 218  | 125  | 0.780 | 0.480 | 1.280 | -0.248 | 0.250 | Indian                            | Child       |
| 52 | Das                | 2011 | TDT  | 354  | 122  | 1.565 | 0.928 | 2.641 | 0.448  | 0.267 | Indian                            | Child       |
| 53 | El-Tarras          | 2012 | CC   | 280  | 120  | 1.910 | 1.230 | 2.960 | 0.647  | 0.224 | Saudi                             | Child       |
| 54 | Hoogman (IMpACT)   | 2013 | CC   | 164  | 87   | 0.760 | 0.450 | 1.280 | -0.274 | 0.267 | Dutch                             | Adults      |
| 55 | Martinez-Levy GA   | 2013 | CC   | 622  | 215  | 1.280 | 0.840 | 1.940 | 0.247  | 0.214 | Mexico                            | Child       |



|    |                     |      |     |      |     |       |       |       |        |       |                     |        |
|----|---------------------|------|-----|------|-----|-------|-------|-------|--------|-------|---------------------|--------|
| 56 | de Azeredo          | 2014 | CC  | 1063 | 476 | 1.040 | 0.870 | 1.260 | 0.039  | 0.094 | Brazil (European)   | Adults |
| 57 | Shang CY            | 2014 | TDT | 1298 | 439 | 1.150 | 0.750 | 1.760 | 0.140  | 0.218 | Taiwan              | Child  |
| 58 | Hasler              | 2015 | CC  | 466  | 75  | 1.190 | 0.810 | 1.750 | 0.174  | 0.197 | European (Swiss)    | Adults |
| 59 | Sery                | 2015 | CC  | 471  | 218 | 1.290 | 0.950 | 1.740 | 0.255  | 0.154 | Czech               | Child  |
| 60 | Fonseca             | 2015 | TDT | 258  | 86  | 1.412 | 0.223 | 2.252 | 0.345  | 0.590 | Columbia (Spanish)  | Child  |
| 61 | Agudelo             | 2015 | CC  | 123  | 70  | 1.060 | 0.560 | 1.980 | 0.058  | 0.322 | Columbia (Spanish)  | Child  |
| 62 | Gomez-Sanchez       | 2016 | CC  | 630  | 290 | 1.080 | 0.860 | 1.360 | 0.077  | 0.117 | Spanish (Caucasian) | Child  |
| 63 | Onnink (NeuroIMAGE) | 2016 | CC  | 487  | 301 | 1.030 | 0.750 | 1.410 | 0.030  | 0.161 | Dutch               | Child  |
| 64 | Onnink (IMpACT+BIG) | 2016 | CC  | 1947 | 118 | 0.930 | 0.690 | 1.250 | -0.073 | 0.152 | Dutch               | Adults |
| 65 | Ortega-Rojas        | 2017 | TDT | 291  | 97  | 0.787 | 0.424 | 1.471 | -0.239 | 0.317 | Columbia (Spanish)  | Child  |
| 66 | Stanley             | 2017 | CC  | 88   | 44  | 3.760 | 1.420 | 9.950 | 1.324  | 0.497 | Indian              | Child  |
| 67 | Wiguna              | 2017 | CC  | 95   | 47  | 2.500 | 1.110 | 5.610 | 0.916  | 0.413 | Indonesian          | Child  |
| 68 | Hong                | 2018 | CC  | 471  | 150 | 1.500 | 0.810 | 2.780 | 0.405  | 0.315 | Korean              | Child  |
| 69 | Morgan              | 2018 | CC  | 212  | 113 | 0.980 | 0.630 | 1.520 | -0.020 | 0.225 | 53% Caucasian       | Child  |
| 70 | Grünblatt           | 2019 | CC  | 376  | 220 | 0.697 | 0.501 | 0.972 | -0.360 | 0.169 | Caucasian (Swiss)   | Child  |
| 71 | Grünblatt           | 2019 | TDT | 743  | 324 | 1.015 | 0.726 | 1.418 | 0.015  | 0.171 | Caucasian (Swiss)   | Child  |

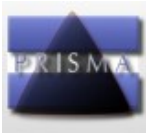

## PRISMA 2009 Flow Diagram

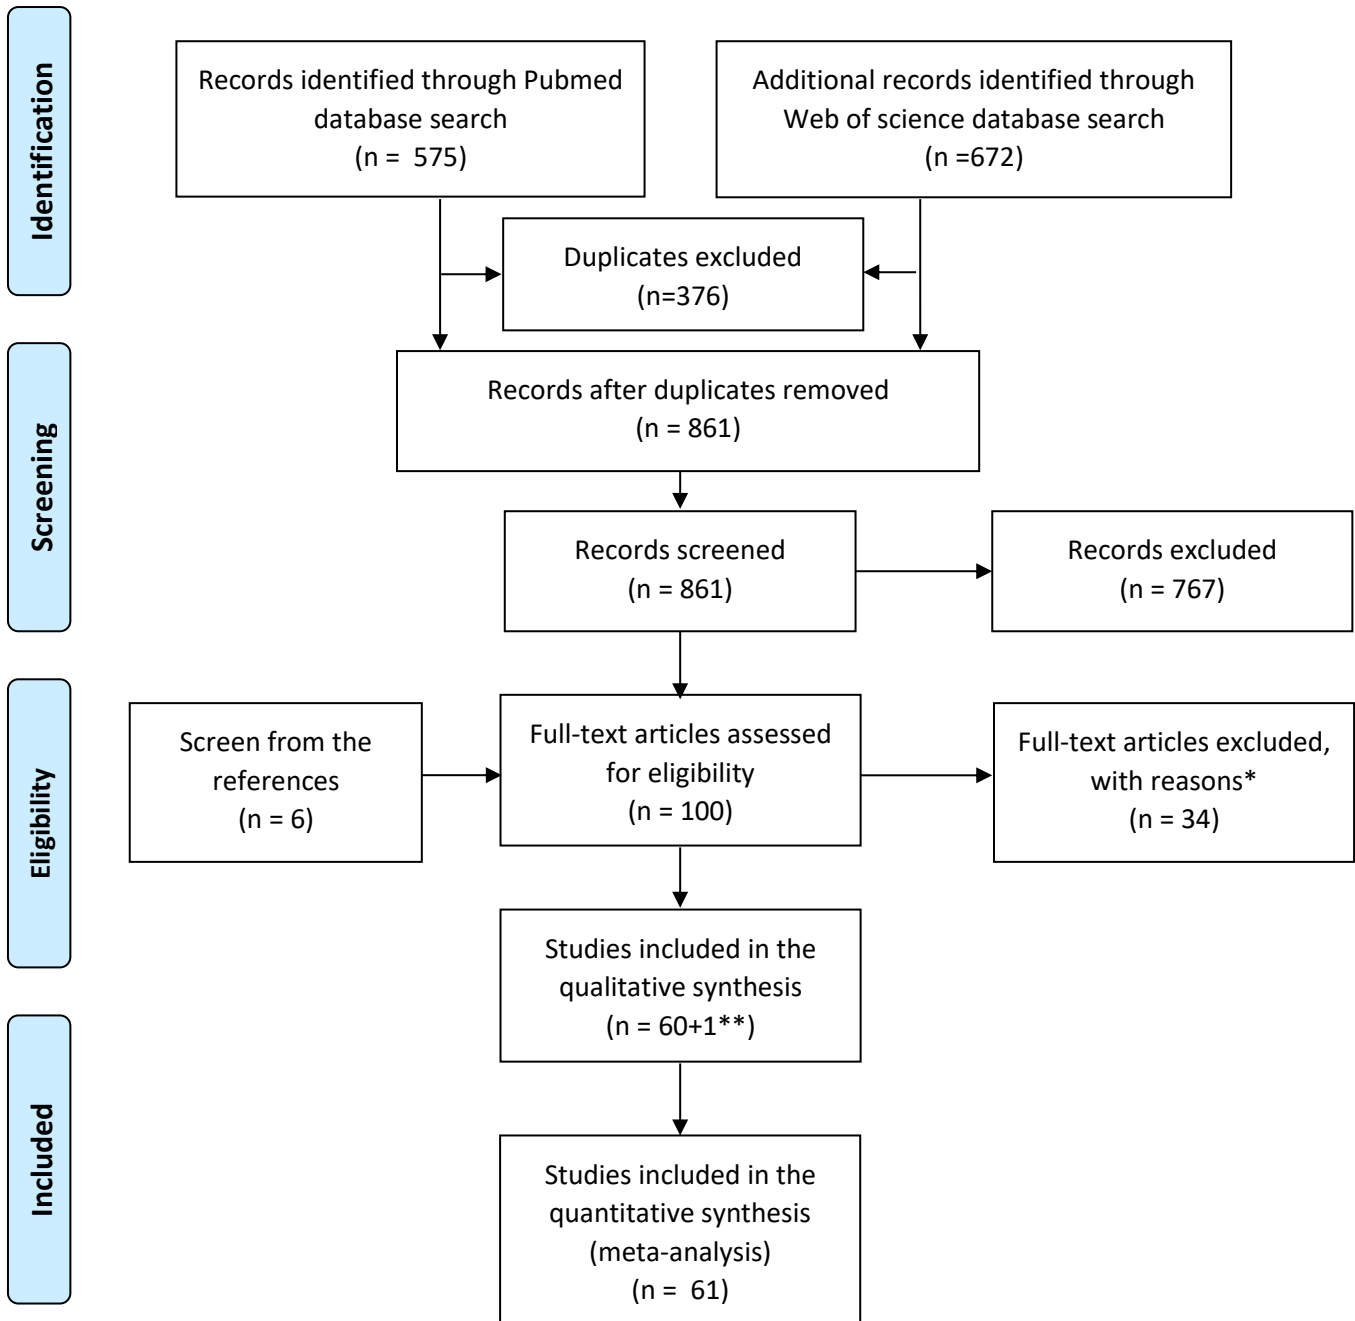

**Supplementary Figure S1** PRISMA Flow diagram for literature search of *DAT1* 3'-UTR VNTR polymorphism and ADHD data published till December 31, 2018. Search terms were (DAT\* OR SLC6A3 OR "dopamine transporter") AND (polymorphism\* OR VNTR OR "tandem repeat" OR "untranslated region") AND (ADHD OR "attention hyperactivity"). \* Details are described in Supplementary Table S1; \*\* Current study samples

**Forest plot for all ADHD studies (n=71)**

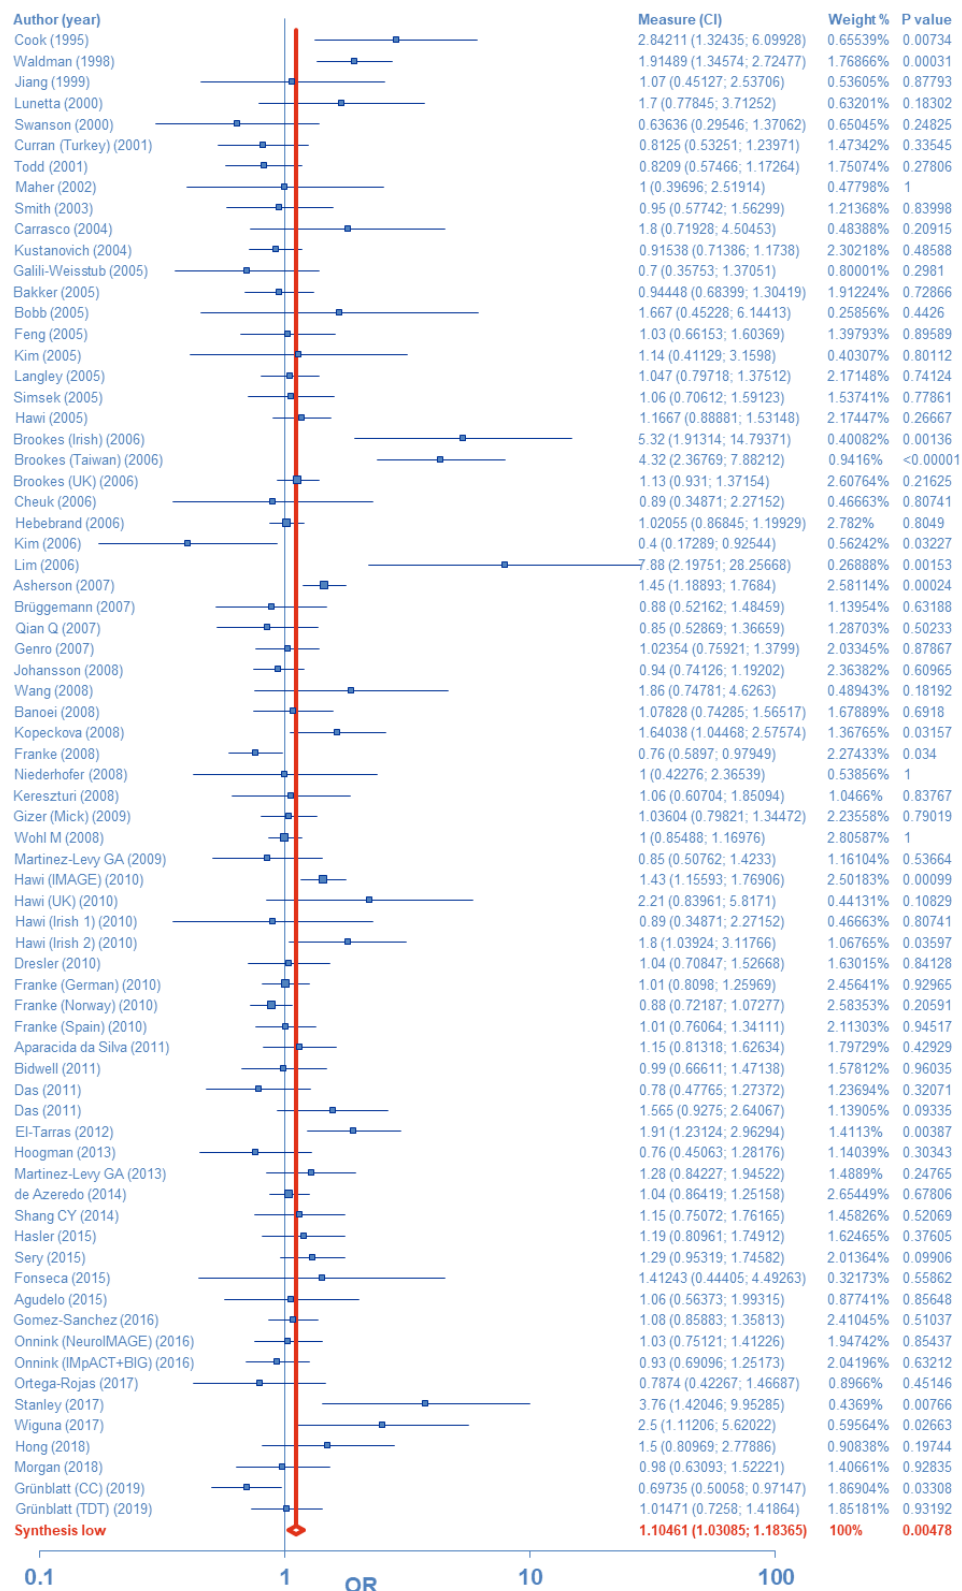

**Supplementary Figure S2** Meta-analysis of all cohorts and published association analyses (n=71) of the *DAT1* 3'-UTR VNTR Long-allele with attention-deficit hyperactivity disorder (ADHD) including ID number, individual OR and 95% CI, individual weight and individual P-value. Black whiskers in the forest plot represent 95% confidence intervals (CI) for odds ratio; the weight (inverse variance) of the study is reflected in symbol (box) size. Sample demographics, individual statistics, heterogeneity, literature bias statistics, quality assessments and scores, and model used is summarized in supplementary tables S3, S5-S6.

### Forest plot for all child and adolescent ADHD studies (n=59)

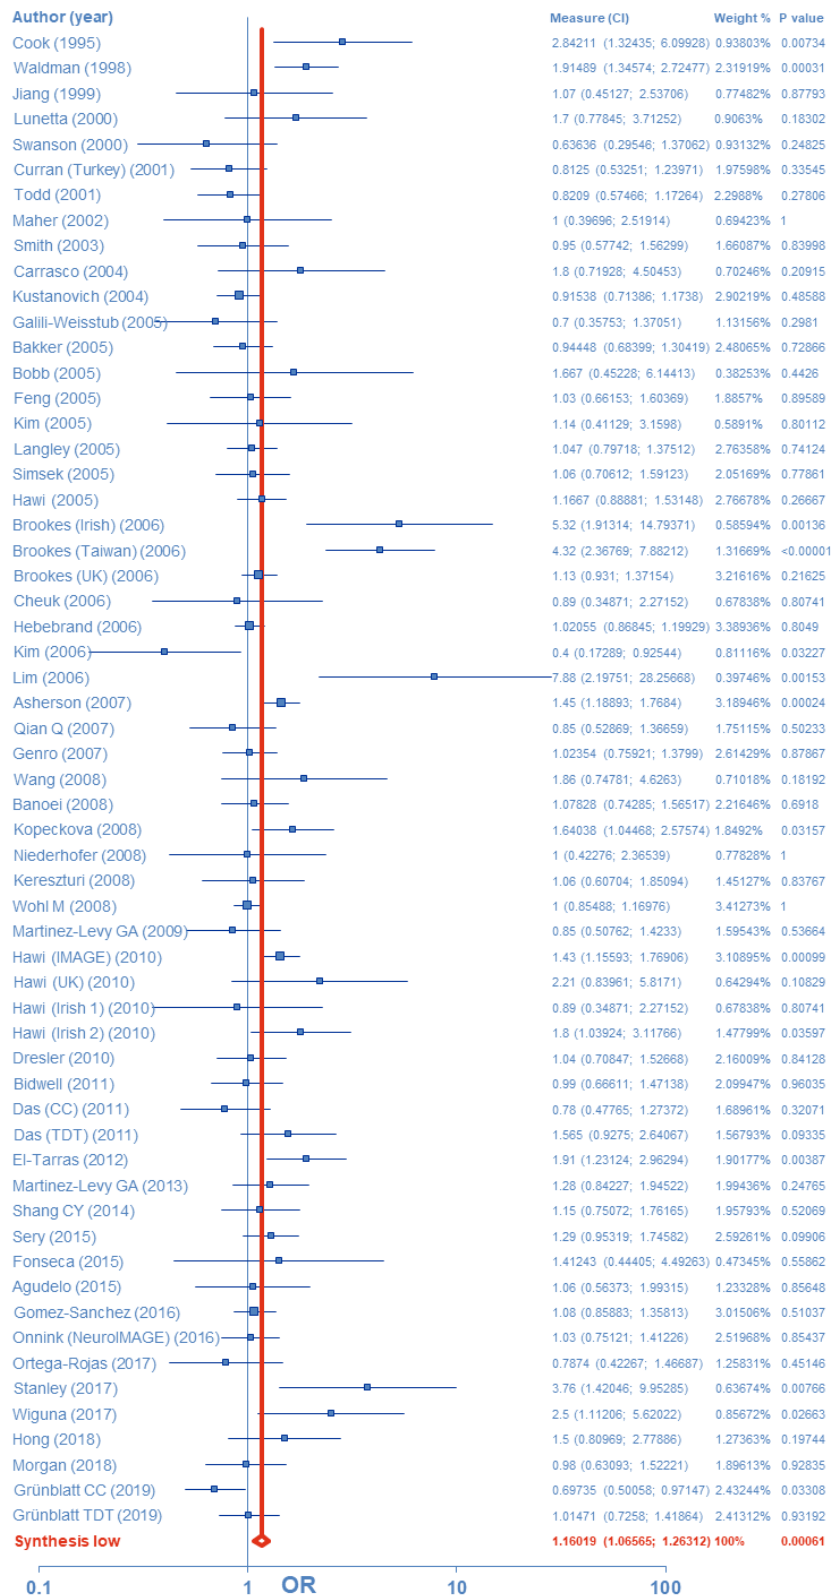

**Supplementary Figure S3** Meta-analysis in child and adolescent ADHD studies (n=59) of the *DAT1* 3'-UTR VNTR Long-allele with attention-deficit hyperactivity disorder (ADHD) including ID number, individual OR and 95% CI, individual weight and individual P-value. Black whiskers in the forest plot represent 95% confidence intervals (CI) for odds ratio; the weight (inverse variance) of the study is reflected in symbol (box) size. Sample demographics, individual statistics, heterogeneity, literature bias statistics, quality assessments and scores, and model used is summarized in supplementary tables S3, S5-S6.



## References

- Adriani W, Romano E, Pucci M, Pascale E, Cerniglia L, Cimino S, Tambelli R, Curatolo P, Granstrem O, Maccarrone M, Laviola G, D'Addario C (2018) Potential for diagnosis versus therapy monitoring of attention deficit hyperactivity disorder: a new epigenetic biomarker interacting with both genotype and auto-immunity. *Eur Child Adolesc Psych* 27 (2):241-252. doi:10.1007/s00787-017-1040-9
- Agudelo JA, Galvez JM, Fonseca DJ, Mateus HE, Talero-Gutierrez C, Velez-Van-Meerbeke A (2015) Evidence of an association between 10/10 genotype of DAT1 and endophenotypes of attention deficit/hyperactivity disorder. *Neurologia* 30 (3):137-143
- Aparecida da Silva M, Cordeiro Q, Louza M, Vallada H (2011) Lack of association between a 3'UTR VNTR polymorphism of dopamine transporter gene (SLC6A3) and ADHD in a Brazilian sample of adult patients. *J Atten Disord* 15 (4):305-309. doi:10.1177/1087054710365989
- Asherson P, Brookes K, Franke B, Chen W, Gill M, Ebstein RP, Buitelaar J, Banaschewski T, Sonuga-Barke E, Eisenberg J, Manor I, Miranda A, Oades RD, Roeyers H, Rothenberger A, Sergeant J, Steinhausen HC, Faraone SV (2007) Confirmation that a specific haplotype of the dopamine transporter gene is associated with combined-type ADHD. *The American journal of psychiatry* 164 (4):674-677. doi:10.1176/ajp.2007.164.4.674
- Bakker SC, van der Meulen EM, Oteman N, Schelleman H, Pearson PL, Buitelaar JK, Sinke RJ (2005) DAT1, DRD4, and DRD5 polymorphisms are not associated with ADHD in Dutch families. *Am J Med Genet B* 132B (1):50-52. doi:10.1002/ajmg.b.30089
- Banoei MM, Majidizadeh T, Shirazi E, Moghimi N, Ghadiri M, Najmabadi H, Ohadi M (2008) No Association Between the DAT1 10-Repeat Allele and ADHD in the Iranian Population. *Am J Med Genet B* 147B (1):110-111. doi:10.1002/ajmg.b.30578
- Barr CL, Xu C, Kroft J, Feng Y, Wigg K, Zai G, Tannock R, Schachar R, Malone M, Roberts W, Nothen MM, Grunhage F, Vandenbergh DJ, Uhl G, Sunohara G, King N, Kennedy JL (2001) Haplotype study of three polymorphisms at the dopamine transporter locus confirm linkage to attention-deficit/hyperactivity disorder. *Biol Psychiatry* 49 (4):333-339. doi:10.1016/s0006-3223(00)01053-2
- Bidwell LC, Willcutt EG, McQueen MB, DeFries JC, Olson RK, Smith SD, Pennington BF (2011) A Family Based Association Study of DRD4, DAT1, and 5HTT and Continuous Traits of Attention-Deficit Hyperactivity Disorder. *Behav Genet* 41 (1):165-174. doi:10.1007/s10519-010-9437-y
- Bobb AJ, Addington AM, Sidransky E, Gornick MC, Lerch JP, Greenstein DK, Clasen LS, Sharp WS, Inoff-Germain G, Wavrant-De Vrieze F, Arcos-Burgos M, Straub RE, Hardy JA, Castellanos FX, Rapoport JL (2005) Support for association between ADHD and two candidate genes: NET1 and DRD1. *American journal of medical genetics Part B, Neuropsychiatric genetics : the official publication of the International Society of Psychiatric Genetics* 134b (1):67-72. doi:10.1002/ajmg.b.30142
- Bonvicini C, Faraone SV, Scassellati C (2016) Attention-deficit hyperactivity disorder in adults: A systematic review and meta-analysis of genetic, pharmacogenetic and biochemical studies. *Mol Psychiatr* 21 (7):872-884. doi:10.1038/mp.2016.74
- Brookes K, Xu X, Chen W, Zhou K, Neale B, Lowe N, Anney R, Franke B, Gill M, Ebstein R, Buitelaar J, Sham P, Campbell D, Knight J, Andreou P, Altink M, Arnold R, Boer F, Buschgens C, Butler L, Christiansen H, Feldman L, Fleischman K, Fliers E, Howe-Forbes R, Goldfarb A, Heise A, Gabriels I, Korn-Lubetzki I, Johansson L, Marco R, Medad S, Minderaa R, Mulas F, Muller U, Mulligan A, Rabin K, Rommelse N, Sethna V, Sorohan J, Uebel H, Psychogiou L, Weeks A, Barrett R, Craig I, Banaschewski T, Sonuga-Barke E, Eisenberg J, Kuntsi J, Manor I, McGuffin P, Miranda A, Oades RD, Plomin R, Roeyers H, Rothenberger A, Sergeant J, Steinhausen HC, Taylor E, Thompson M, Faraone SV, Asherson P (2006) The analysis of 51 genes in DSM-IV combined type attention deficit hyperactivity disorder: association signals in DRD4, DAT1 and 16 other genes. *Mol Psychiatry* 11 (10):934-953. doi:10.1038/sj.mp.4001869
- Brown AB, Biederman J, Valera E, Makris N, Doyle A, Whitfield-Gabrieli S, Mick E, Spencer T, Faraone S, Seidman L (2011) Relationship of DAT1 and adult ADHD to task-positive and task-negative working memory networks. *Psychiatry Res* 193 (1):7-16. doi:10.1016/j.psychres.2011.01.006
- Brüggemann D, Sobanski E, Alm B, Schubert T, Schmalzried H, Philipsen A, Breen G, Becker T, Georgi A, Skowronek MH, Schulze TG, Treutlein J, Rietschel M (2007) No association between a common haplotype of the 6 and 10-repeat alleles in intron 8 and the 3'UTR of the DAT1 gene and adult attention deficit hyperactivity disorder. *Psychiatr Genet* 17 (2):121. doi:10.1097/YPG.0b013e32801231d4
- Carrasco X, Rothhammer P, Moraga M, Henriquez H, Aboitiz F, Rothhammer F (2004) Presence of DRD4/7R and DAT1/10R allele in Chilean family members with attention deficit hyperactivity disorder. *Rev Medica Chile* 132 (9):1047-1052
- Carrasco X, Rothhammer P, Moraga M, Henriquez H, Chakraborty R, Aboitiz F, Rothhammer F (2006) Genotypic interaction between DRD4 and DAT1 loci is a high risk factor for attention-deficit/hyperactivity disorder in Chilean families. *Am J Med Genet B* 141B (1):51-54. doi:10.1002/ajmg.b.30259

- Chen CK, Chen SL, Mill J, Huang YS, Lin SK, Curran S, Purcell S, Sham P, Asherson P (2003) The dopamine transporter gene is associated with attention deficit hyperactivity disorder in a Taiwanese sample. *Mol Psychiatr* 8 (4):393-396. doi:10.1038/sj.mp.4001238
- Cheuk DK, Li SY, Wong V (2006) No association between VNTR polymorphisms of dopamine transporter gene and attention deficit hyperactivity disorder in Chinese children. *American journal of medical genetics Part B, Neuropsychiatric genetics : the official publication of the International Society of Psychiatric Genetics* 141b (2):123-125. doi:10.1002/ajmg.b.30280
- Cook EH, Stein MA, Krasowski MD, Cox NJ, Olkon DM, Kieffer JE, Leventhal BL (1995) ASSOCIATION OF ATTENTION-DEFICIT DISORDER AND THE DOPAMINE TRANSPORTER GENE. *Am J Hum Genet* 56 (4):993-998
- Cornish KM, Manly T, Savage R, Swanson J, Morisano D, Butler N, Grant C, Cross G, Bentley L, Hollis CP (2005) Association of the dopamine transporter (DAT1) 10/10-repeat genotype with ADHD symptoms and response inhibition in a general population sample. *Mol Psychiatr* 10 (7):686-698. doi:10.1038/sj.mp.4001641
- Costa A, Riedel M, Muller U, Moller HJ, Ettinger U (2011) Relationship between SLC6A3 genotype and striatal dopamine transporter availability: a meta-analysis of human single photon emission computed tomography studies. *Synapse* 65 (10):998-1005. doi:10.1002/syn.20927
- Curran S, Mill J, Tahir E, Kent L, Richards S, Gould A, Huckett L, Sharp J, Batten C, Fernando S, Ozbay F, Yazgan Y, Simonoff E, Thompson M, Taylor E, Asherson P (2001) Association study of a dopamine transporter polymorphism and attention deficit hyperactivity disorder in UK and Turkish samples. *Mol Psychiatr* 6 (4):425-428. doi:10.1038/sj.mp.4000914
- Daly G, Hawi Z, Fitzgerald M, Gill M (1999) Mapping susceptibility loci in attention deficit hyperactivity disorder: preferential transmission of parental alleles at DAT1, DBH and DRD5 to affected children. *Mol Psychiatr* 4 (2):192-196. doi:10.1038/sj.mp.4000510
- Das M, Das Bhowmik A, Bhaduri N, Sarkar K, Ghosh P, Sinha S, Ray A, Chatterjee A, Mukhopadhyay K (2011) Role of gene-gene/gene-environment interaction in the etiology of eastern Indian ADHD probands. *Prog Neuro-Psychopharmacol Biol Psychiatry* 35 (2):577-587. doi:10.1016/j.pnpbp.2010.12.027
- Das M, Mukhopadhyay K (2007) DAT1 3'-UTR 9R Allele: Preferential transmission in Indian children with attention deficit hyperactivity disorder. *Am J Med Genet B* 144B (6):826-829. doi:10.1002/ajmg.b.30513
- de Azeredo LA, Rovaris DL, Mota NR, Polina ER, Marques FZ, Contini V, Vitola ES, Belmonte-de-Abreu P, Rohde LA, Grevet EH, Bau CH (2014) Further evidence for the association between a polymorphism in the promoter region of SLC6A3/DAT1 and ADHD: findings from a sample of adults. *Eur Arch Psychiatry Clin Neurosci* 264 (5):401-408. doi:10.1007/s00406-014-0486-8
- DiMaio S, Grizenko N, Joobor R (2003) Dopamine genes and attention-deficit hyperactivity disorder: a review. *J Psychiatry Neurosci* 28 (1):27-38
- Dresler T, Ehliis AC, Heinzl S, Renner TJ, Reif A, Baehne CG, Heine M, Boreatti-Hummer A, Jacob CP, Lesch KP, Fallgatter AJ (2010) Dopamine Transporter (SLC6A3) Genotype Impacts Neurophysiological Correlates of Cognitive Response Control in an Adult Sample of Patients with ADHD. *Neuropsychopharmacology* 35 (11):2193-2202. doi:10.1038/npp.2010.91
- El-Tarras AE, Alsulaimani AA, Awad NS, Mitwaly N, Said MM, Sabry AM (2012) Association study between the dopamine-related candidate gene polymorphisms and ADHD among Saudi Arabia population via PCR technique. *Mol Biol Rep* 39 (12):11081-11086. doi:10.1007/s11033-012-2012-2
- Ettinger U, Merten N, Kambeitz J (2016) Meta-analysis of the association of the SLC6A3 3'-UTR VNTR with cognition. *Neurosci Biobehav Rev* 60:72-81. doi:10.1016/j.neubiorev.2015.09.021
- Faraone SV, Spencer TJ, Madras BK, Zhang-James Y, Biederman J (2014) Functional effects of dopamine transporter gene genotypes on in vivo dopamine transporter functioning: a meta-analysis. *Mol Psychiatr* 19 (8):880-889. doi:10.1038/mp.2013.126
- Feng Y, Wigg KG, Makkar R, Ickowicz A, Pathare T, Tannock R, Roberts W, Malone M, Kennedy JL, Schachar R, Barr CL (2005) Sequence variation in the 3'-untranslated region of the dopamine transporter gene and attention-deficit hyperactivity disorder (ADHD). *Am J Med Genet B* 139B (1):1-6. doi:10.1002/ajmg.b30190
- Fonseca DJ, Mateus HE, Galvez JM, Forero DA, Talero-Gutierrez C, Velez-van-Meerbeke A (2015) Lack of association of polymorphisms in six candidate genes in colombian adhd patients. *Ann Neurosci* 22 (4):217-221. doi:10.5214/ans.0972.7531.220405
- Franke B, Hoogman M, Arias Vasquez A, Heister JG, Savelkoul PJ, Naber M, Scheffer H, Kiemeneij LA, Kan CC, Kooij JJ, Buitelaar JK (2008) Association of the dopamine transporter (SLC6A3/DAT1) gene 9-6 haplotype with adult ADHD. *American journal of medical genetics Part B, Neuropsychiatric genetics : the official publication of the International Society of Psychiatric Genetics* 147b (8):1576-1579. doi:10.1002/ajmg.b.30861
- Franke B, Vasquez AA, Johansson S, Hoogman M, Romanos J, Boreatti-Hummer A, Heine M, Jacob CP, Lesch KP, Casas M, Ribases M, Bosch R, Sanchez-Mora C, Gomez-Barros N, Fernandez-Castillo N, Bayes M, Halmoy A, Helleland H, Landaas ET, Fasmer OB, Knappskog PM, Heister A, Kiemeneij LA, Kooij JJS,

- Boonstra AM, Kan CC, Asherson P, Faraone SV, Buitelaar JK, Haavik J, Cormand B, Ramos-Quiroga JA, Reif A (2010) Multicenter Analysis of the SLC6A3/DAT1 VNTR Haplotype in Persistent ADHD Suggests Differential Involvement of the Gene in Childhood and Persistent ADHD. *Neuropsychopharmacology* 35 (3):656-664. doi:10.1038/npp.2009.170
- Galili-Weisstub E, Levy S, Frisch A, Gross-Tsur V, Michaelovsky E, Kosov A, Meltzer A, Goltser T, Serretti A, Cusin C, Darvasi A, Inbar E, Weizman A, Segman RH (2005) Dopamine transporter haplotype and attention-deficit hyperactivity disorder. *Mol Psychiatry* 10 (7):617-618. doi:10.1038/sj.mp.4001655
- Gatt JM, Burton KL, Williams LM, Schofield PR (2015) Specific and common genes implicated across major mental disorders: a review of meta-analysis studies. *J Psychiatr Res* 60:1-13. doi:10.1016/j.jpsychires.2014.09.014
- Genro JP, Polanczyk GV, Zeni C, Oliveira AS, Roman T, Rohde LA, Hutz MH (2008) A Common Haplotype at the Dopamine Transporter Gene 5' Region is Associated With Attention-Deficit/Hyperactivity Disorder. *Am J Med Genet B* 147B (8):1568-1575. doi:10.1002/ajmg.b.30863
- Gill M, Daly G, Heron S, Hawi Z, Fitzgerald M (1997) Confirmation of association between attention deficit hyperactivity disorder and a dopamine transporter polymorphism. *Mol Psychiatr* 2 (4):311-313. doi:10.1038/sj.mp.4000290
- Gizer IR, Ficks C, Waldman ID (2009) Candidate gene studies of ADHD: a meta-analytic review. *Hum Genet* 126 (1):51-90. doi:10.1007/s00439-009-0694-x
- Gomez-Sanchez CI, Riveiro-Alvarez R, Soto-Insuga V, Rodrigo M, Tirado-Requero P, Mahillo-Fernandez I, Abad-Santos F, Carballo JJ, Dal-Re R, Ayuso C (2016) Attention deficit hyperactivity disorder: genetic association study in a cohort of Spanish children. *Behav Brain Funct* 12:10. doi:10.1186/s12993-015-0084-6
- Hasler R, Salzmann A, Bolzan T, Zimmermann J, Baud P, Giannakopoulos P, Perroud N (2015) DAT1 and DRD4 genes involved in key dimensions of adult ADHD. *Neurol Sci* 36 (6):861-869. doi:10.1007/s10072-014-2051-7
- Hawi Z, Kent L, Hill M, Anney RJ, Brookes KJ, Barry E, Franke B, Banaschewski T, Buitelaar J, Ebstein R, Miranda A, Oades RD, Roeyers H, Rothenberger A, Sergeant J, Sonuga-Barke E, Steinhausen HC, Faraone SV, Asherson P, Gill M (2010) ADHD and DAT1: further evidence of paternal over-transmission of risk alleles and haplotype. *American journal of medical genetics Part B, Neuropsychiatric genetics : the official publication of the International Society of Psychiatric Genetics* 153b (1):97-102. doi:10.1002/ajmg.b.30960
- Hawi Z, Lowe N, Kirley A, Gruenhage F, Nothen M, Greenwood T, Kelsoe J, Fitzgerald M, Gill M (2003) Linkage disequilibrium mapping at DAT1, DRD5 and DBH narrows the search for ADHD susceptibility alleles at these loci. *Mol Psychiatr* 8 (3):299-308. doi:10.1038/sj.mp.4001290
- Hawi Z, Segurado R, Conroy J, Sheehan K, Lowe N, Kirley A, Shields D, Fitzgerald M, Gallagher L, Gill M (2005) Preferential transmission of paternal alleles at risk genes in attention-deficit/hyperactivity disorder. *Am J Hum Genet* 77 (6):958-965. doi:10.1086/498174
- Hebebrand J, Dempfle A, Saar K, Thiele H, Herpertz-Dahlmann B, Linder M, Kiefl H, Remschmidt H, Hemminger U, Warnke A, Knolker U, Heiser P, Friedel S, Hinney A, Schafer H, Nurnberg P, Konrad K (2006) A genome-wide scan for attention-deficit/hyperactivity disorder in 155 German sib-pairs. *Mol Psychiatr* 11 (2):196-205. doi:10.1038/sj.mp.4001761
- Holmes J, Payton A, Barrett JH, Hever T, Fitzpatrick H, Trumper AL, Harrington R, McGuffin P, Owen M, Ollier W, Worthington J, Thapar A (2000) A family-based and case-control association study of the dopamine D4 receptor gene and dopamine transporter gene in attention deficit hyperactivity disorder. *Mol Psychiatr* 5 (5):523-530. doi:10.1038/sj.mp.4000751
- Hong JH, Hwang IW, Lim MH, Kwon HJ, Jin HJ (2018) Genetic associations between ADHD and dopaminergic genes (DAT1 and DRD4) VNTRs in Korean children. *Genes Genom* 40 (12):1309-1317. doi:10.1007/s13258-018-0726-9
- Hoogman M, Onnink M, Cools R, Aarts E, Kan C, Arias Vasquez A, Buitelaar J, Franke B (2013) The dopamine transporter haplotype and reward-related striatal responses in adult ADHD. *European neuropsychopharmacology : the journal of the European College of Neuropsychopharmacology* 23 (6):469-478. doi:10.1016/j.euroneuro.2012.05.011
- Jiang S, Xin R, Qian Y, Lin S, Tang G, Wang D, Chen M, Ren D (1999) The relationship between attention-deficit hyperactivity disorder and dopamine transporter 1 gene. *Chinese Journal Nervous and Mental Disease* 25:355-357
- Johansson S, Hallelund H, Halmoy A, Jacobsen KK, Landaas ET, Dramsdahl M, Fasmer OB, Bergsholm P, Lundervold AJ, Gillberg C, Hugdahl K, Knappskog PM, Haavik J (2008) Genetic Analyses of Dopamine Related Genes in Adult ADHD Patients Suggest an Association With the DRD5-Microsatellite Repeat, But Not With DRD4 or SLC6A3 VNTRs. *Am J Med Genet B* 147B (8):1470-1475. doi:10.1002/ajmg.b.30662
- Kambeitz J, Romanos M, Ettinger U (2014) Meta-analysis of the association between dopamine transporter genotype and response to methylphenidate treatment in ADHD. *Pharmacogenomics J* 14 (1):77-84. doi:10.1038/tpj.2013.9



- Kereszturi E, Tarnok Z, Bognar E, Lakatos K, Farkas L, Gadoros J, Sasvari-Szekely M, Nemoda Z (2008) Catechol-O-Methyltransferase Val158Met Polymorphism Is Associated With Methylphenidate Response in ADHD Children. *Am J Med Genet B* 147B (8):1431-1435. doi:10.1002/ajmg.b.30704
- Kim JW, Kim BN, Cho SC (2006) The dopamine transporter gene and the impulsivity phenotype in attention deficit hyperactivity disorder: A case-control association study in a Korean sample. *J Psychiatr Res* 40 (8):730-737. doi:10.1016/j.jpsychires.2005.11.002
- Kim YS, Leventhal BL, Kim SJ, Kim BN, Cheon KA, Yoo HJ, Kim SJ, Badner J, Cook EH (2005) Family-based association study of DAT1 and DRD4 polymorphism in Korean children with ADHD. *Neurosci Lett* 390 (3):176-181. doi:10.1016/j.neulet.2005.08.025
- Kirley A, Hawi Z, Daly G, McCarron M, Mullins C, Millar N, Waldman I, Fitzgerald M, Gill M (2002) Dopaminergic system genes in ADHD: Toward a biological hypothesis. *Neuropsychopharmacology* 27 (4):607-619
- Kopeckova M, Paclt I, Petrusek J, Pacltova D, Malikova M, Zagatova V (2008) Some ADHD polymorphisms (in genes DAT1, DRD2, DRD3, DBH, 5-HTT) in case-control study of 100 subjects 6-10 age. *Neuroendocrinol Lett* 29 (2):246-251
- Kustanovich V, Ishii J, Crawford L, Yang M, McGough JJ, McCracken JT, Smalley SL, Nelson SF (2004) Transmission disequilibrium testing of dopamine-related candidate gene polymorphisms in ADHD: confirmation of association of ADHD with DRD4 and DRD5. *Mol Psychiatr* 9 (7):711-717. doi:10.1038/sj.mp.4001466
- Langley K, Fowler TA, Grady DL, Moyzis RK, Holmans PA, van den Bree MB, Owen MJ, O'Donovan MC, Thapar A (2009) Molecular genetic contribution to the developmental course of attention-deficit hyperactivity disorder. *Eur Child Adolesc Psychiatry* 18 (1):26-32. doi:10.1007/s00787-008-0698-4
- Langley K, Turic D, Peirce TR, Mills S, Van den Bree MB, Owen MJ, O'Donovan MC, Thapar A (2005) No support for association between the dopamine transporter (DAT1) gene and ADHD. *Am J Med Genet B* 139B (1):7-10. doi:10.1002/ajmg.b.30206
- Li D, Sham PC, Owen MJ, He L (2006) Meta-analysis shows significant association between dopamine system genes and attention deficit hyperactivity disorder (ADHD). *Hum Mol Genet* 15 (14):2276-2284. doi:10.1093/hmg/ddl152
- Lim MH, Kim HW, Paik KC, Cho SC, Yoon DY, Lee HJ (2006) Association of the DAT1 polymorphism with attention deficit hyperactivity disorder (ADHD): A family-based approach. *Am J Med Genet B* 141B (3):309-311. doi:10.1002/ajmg.b.30282
- Liu J, Yang A, Zhang Q, Yang G, Yang W, Lei H, Quan J, Qu F, Wang M, Zhang Z, Yu K (2015) Association between genetic variants in SLC25A12 and risk of autism spectrum disorders: An integrated meta-analysis. *Am J Med Genet B Neuropsychiatr Genet* 168B (4):236-246. doi:10.1002/ajmg.b.32304
- Lunetta KL, Faraone SV, Biederman J, Laird NM (2000) Family-based tests of association and linkage that use unaffected sibs, covariates, and interactions. *Am J Hum Genet* 66 (2):605-614. doi:10.1086/302782
- Maher BS, Marazita ML, Ferrell RE, Vanyukov MM (2002) Dopamine system genes and attention deficit hyperactivity disorder: a meta-analysis. *Psychiatr Genet* 12 (4):207-215. doi:10.1097/00041444-200212000-00003
- Martinez-Levy G, Diaz-Galvis J, Briones-Velasco M, Gomez-Sanchez A, De la Pena-Olvera F, Sosa-Mora L, Palacios-Cruz L, Ricardo-Garcell J, Reyes-Zamorano E, Cruz-Fuentes C (2009) Genetic interaction analysis for DRD4 and DAT1 genes in a group of Mexican ADHD patients. *Neurosci Lett* 451 (3):257-260. doi:10.1016/j.neulet.2009.01.004
- Martinez-Levy GA, Benjet C, Briones-Velasco M, Perez-Molina A, Nani A, Cruz-Fuentes CS (2013) Genetic variability of DRD4 and DAT1 in the urban population of Mexico City. *Salud Ment* 36 (3):189-192. doi:10.17711/sm.0185-3325.2013.024
- Morgan JE, Caplan B, Tung I, Norona AN, Baker BL, Lee SS (2018) COMT and DAT1 polymorphisms moderate the indirect effect of parenting behavior on youth ADHD symptoms through neurocognitive functioning. *Child Neuropsychol* 24 (6):823-843. doi:10.1080/09297049.2017.1346067
- Niederhofer H, Menzel F, Gobel K, Hackenberg B, Richter R, Walter MH, Gross C, Huber M, Pycha R, Menzel HJ (2008) A preliminary report of the dopamine receptor D(4) and the dopamine transporter 1 gene polymorphism and its association with attention deficit hyperactivity disorder. *Neuropsychiatr Dis Treat* 4 (4):701-705
- Nyman ES, Ogdie MN, Loukola A, Varilo T, Taanila A, Hurtig T, Moilanen IK, Loo SK, McGough JJ, Jarvelin MR, Smalley SL, Nelson SF, Peltonen L (2007) ADHD candidate gene study in a population-based birth cohort: association with DBH and DRD2. *J Am Acad Child Adolesc Psychiatry* 46 (12):1614-1621. doi:10.1097/chi.0b013e3181579682
- Onnink AM, Franke B, van Hulzen K, Zwierns MP, Mostert JC, Schene AH, Heslenfeld DJ, Oosterlaan J, Hoekstra PJ, Hartman CA, Vasquez AA, Kan CC, Buitelaar J, Hoogman M (2016) Enlarged striatal volume in adults with ADHD carrying the 9-6 haplotype of the dopamine transporter gene DAT1. *Journal of neural transmission (Vienna, Austria : 1996)* 123 (8):905-915. doi:10.1007/s00702-016-1521-x

- Ortega-Rojas J, Arboleda-Bustos CE, Morales L, Benitez BA, Beltran D, Izquierdo A, Arboleda H, Vasquez R (2017) [Study of genetic variants in the BDNF, COMT, DAT1 and SERT genes in Colombian children with attention deficit disorder]. *Revista colombiana de psiquiatria* 46 (4):222-228. doi:10.1016/j.rcp.2016.08.006
- Palmer CG, Bailey JN, Ramsey C, Cantwell D, Sinsheimer JS, Del'Homme M, McGough J, Woodward JA, Asarnow R, Asarnow J, Nelson S, Smalley SL (1999) No evidence of linkage or linkage disequilibrium between DAT1 and attention deficit hyperactivity disorder in a large sample. *Psychiatr Genet* 9 (3):157-160
- Purper-Ouakil D, Wohl M, Mouren MC, Verpillat R, Ades J, Gorwood R (2005) Meta-analysis of family-based association studies between the dopamine transporter gene and attention deficit hyperactivity disorder. *Psychiatr Genet* 15 (1):53-59. doi:10.1097/00041444-200503000-00009
- Qian Q, Wang Y, Li J, Yang L, Wang B, Zhou R, Glatt SJ, Faraone SV (2007) Evaluation of potential gene-gene interactions for attention deficit hyperactivity disorder in the Han Chinese population. *American journal of medical genetics Part B, Neuropsychiatric genetics : the official publication of the International Society of Psychiatric Genetics* 144b (2):200-206. doi:10.1002/ajmg.b.30422
- Qian Q, Wang Y, Zhou R, Yang L, Faraone SV (2004) Family-based and case-control association studies of DRD4 and DAT1 polymorphisms in Chinese attention deficit hyperactivity disorder patients suggest long repeats contribute to genetic risk for the disorder. *American journal of medical genetics Part B, Neuropsychiatric genetics : the official publication of the International Society of Psychiatric Genetics* 128b (1):84-89. doi:10.1002/ajmg.b.30079
- Roman T, Schmitz M, Polanczyk G, Eizirik M, Rohde LA, Hutz MH (2001) Attention-deficit hyperactivity disorder: A study of association with both the dopamine transporter gene and the dopamine D4 receptor gene. *Am J Med Genet* 105 (5):471-478. doi:10.1002/ajmg.1408
- Rowe DC, Stever C, Chase D, Sherman S, Abramowitz A, Waldman ID (2001) Two dopamine genes related to reports of childhood retrospective inattention and conduct disorder symptoms. *Mol Psychiatr* 6 (4):429-433. doi:10.1038/sj.mp.4000874
- Sery O, Paclt I, Drtilkova I, Theiner P, Kopeckova M, Zvolisky P, Balcar VJ (2015) A 40-bp VNTR polymorphism in the 3'-untranslated region of DAT1/SLC6A3 is associated with ADHD but not with alcoholism. *Behav Brain Funct* 11:8. doi:10.1186/s12993-015-0066-8
- Shang CY, Gau SS (2014) Association between the DAT1 gene and spatial working memory in attention deficit hyperactivity disorder. *The international journal of neuropsychopharmacology* 17 (1):9-21. doi:10.1017/s1461145713000783
- Shang CY, Gau SS, Liu CM, Hwu HG (2011) Association between the dopamine transporter gene and the inattentive subtype of attention deficit hyperactivity disorder in Taiwan. *Prog Neuropsychopharmacol Biol Psychiatry* 35 (2):421-428. doi:10.1016/j.pnpbp.2010.08.016
- Simsek M, Al-Sharbati M, Al-Adawi S, Ganguly SS, Lawatia K (2005) Association of the risk allele of dopamine transporter gene (DAT1\*10) in Omani male children with attention-deficit hyperactivity disorder. *Clin Biochem* 38 (8):739-742. doi:10.1016/j.clinbiochem.2005.04.016
- Smith KM, Daly M, Fischer M, Yiannoutsos CT, Bauer L, Barkley R, Navia BA (2003) Association of the dopamine beta hydroxylase gene with attention deficit hyperactivity disorder: Genetic analysis of the Milwaukee longitudinal study. *Am J Med Genet B* 119B (1):77-85. doi:10.1002/ajmg.b.20005
- Soleimani R, Salehi Z, Soltanipour S, Hasandokht T, Jalali MM (2018) SLC6A3 polymorphism and response to methylphenidate in children with ADHD: A systematic review and meta-analysis. *Am J Med Genet B* 177 (3):287-300. doi:10.1002/ajmg.b.32613
- Spencer TJ, Biederman J, Faraone SV, Madras BK, Bonab AA, Dougherty DD, Batchelder H, Clarke A, Fischman AJ (2013) Functional Genomics of Attention-Deficit/Hyperactivity Disorder (ADHD) Risk Alleles on Dopamine Transporter Binding in ADHD and Healthy Control Subjects. *Biol Psychiatry* 74 (2):84-89. doi:10.1016/j.biopsych.2012.11.010
- Stanley A, Chavda K, Subramanian A, Prabhu SV, Ashavaid TF (2017) DRD4 and DAT1 VNTR Genotyping in Children with Attention Deficit Hyperactivity Disorder. *Indian J Clin Biochem* 32 (2):239-242. doi:10.1007/s12291-016-0587-4
- Swanson JM, Flodman P, Kennedy S, Spence MA, Moyzis R, Schuck S, Murias M, Moriarity J, Barr C, Smith M, Posner M (2000) Dopamine genes and ADHD. *Neurosci Biobehav Rev* 24 (1):21-25. doi:10.1016/s0149-7634(99)00062-7
- Todd RD, Huang H, Smalley SL, Nelson SF, Willcutt EG, Pennington BF, Smith SD, Faraone SV, Neuman RJ (2005) Collaborative analysis of DRD4 and DAT genotypes in population-defined ADHD subtypes. *Journal of child psychology and psychiatry, and allied disciplines* 46 (10):1067-1073. doi:10.1111/j.1469-7610.2005.01517.x
- Todd RD, Jong YJ, Lobos EA, Reich W, Heath AC, Neuman RJ (2001) No association of the dopamine transporter gene 3' VNTR polymorphism with ADHD subtypes in a population sample of twins. *Am J Med Genet* 105 (8):745-748
- van Rooij D, Hoekstra PJ, Bralten J, Hakobjan M, Oosterlaan J, Franke B, Rommelse N, Buitelaar JK, Hartman CA (2015) Influence of DAT1 and COMT variants on neural activation during response inhibition in

- adolescents with attention-deficit/hyperactivity disorder and healthy controls. *Psychol Med* 45 (15):3159-3170. doi:10.1017/s0033291715001130
- Waldman ID, Rowe DC, Abramowitz A, Kozel ST, Mohr JH, Sherman SL, Cleveland HH, Sanders ML, Card JHC, Stever C (1998) Association and linkage of the dopamine transporter gene and attention-deficit hyperactivity disorder in children: Heterogeneity owing to diagnostic subtype and severity. *Am J Hum Genet* 63 (6):1767-1776. doi:10.1086/302132
- Wang Y, Wang Z, Yao K, Tanaka K, Yang Y, Shirakawa O, Maeda K (2008) Lack of association between the dopamine transporter gene 3' VNTR polymorphism and attention deficit hyperactivity disorder in Chinese Han children: case-control and family-based studies. *The Kobe journal of medical sciences* 53 (6):327-333
- Wang Z, Wang Y, Yao K, Yang Y, Liu L (2004) Survey the association between dopamine transporter gene polymorphism and attention deficit hyperactivity disorder. *Chinese Journal of child health care* 12:289-292
- Wiguna T, Ismail RI, Winarsih NS, Kaligis F, Hapsari A, Budiyanti L, Sekartini R, Rahayu S, Guerrero APS (2017) Dopamine transporter gene polymorphism in children with ADHD: A pilot study in Indonesian samples. *Asian J Psychiatr* 29:35-38. doi:10.1016/j.ajp.2017.03.041
- Wohl M, Boni C, Asch M, Cortese S, Orejarena S, Mouren MC, Gorwood P, Purper-Ouakil D (2008) Lack of association of the dopamine transporter gene in a French ADHD sample. *American journal of medical genetics Part B, Neuropsychiatric genetics : the official publication of the International Society of Psychiatric Genetics* 147b (8):1509-1510. doi:10.1002/ajmg.b.30695
- Yang B, Chan RC, Jing J, Li T, Sham P, Chen RY (2007) A meta-analysis of association studies between the 10-repeat allele of a VNTR polymorphism in the 3'-UTR of dopamine transporter gene and attention deficit hyperactivity disorder. *American journal of medical genetics Part B, Neuropsychiatric genetics : the official publication of the International Society of Psychiatric Genetics* 144b (4):541-550. doi:10.1002/ajmg.b.30453
