# Supplementary material for: Association study and a systematic meta-analysis of the VNTR polymorphism in the 3′-UTR of dopamine transporter gene and attention-deficit hyperactivity disorder
Source: Springer Nature journal article supplement (doi:10.1007/s00702-019-01998-x), 2019-03-28
Supplement: MOESM2 [file 16581752]

**Supplementary Table S2** Summary statistics for meta-analysis of DAT1 3'-UTR VNTR 10-repeat allele as risk allele versus 9-repeat allele, in all ADHD samples as well as stratified by age or ethnicity. Including heterogeneity statistics, literature bias analysis followed by Trim and Fill corrections.

| ID included                                                                        | Total no. Studies included | Definition                                | Heterogeneity statistics (I2) |         |         |                | Synthesis model |        | Synthesis details |               |               |         |               |         |        | Begg's test |         |         |        |         | Egger's regression test (intercept) |         |         |         |        | Trim and fill correction |    |     |     |
|------------------------------------------------------------------------------------|----------------------------|-------------------------------------------|-------------------------------|---------|---------|----------------|-----------------|--------|-------------------|---------------|---------------|---------|---------------|---------|--------|-------------|---------|---------|--------|---------|-------------------------------------|---------|---------|---------|--------|--------------------------|----|-----|-----|
|                                                                                    |                            |                                           | Estimate                      | CI-     | CI+     | p-value        | Fixed           | Random | N                 | OR            | ci-           | ci+     | z             | p       | tau b  | k           | S (P-Q) | ties    | z      | p       | coef                                | se      | ci-     | ci+     | z      | p                        | OR | ci- | ci+ |
| 1-71                                                                               | 71                         | all ADHD                                  | 50.003%                       | 34.19%  | 62.017% | 0              |                 | Yes    | 40129             | 1.0552        | 0.9880        | 1.1269  | 1.6001        | 0.1096  | 0.1328 | 71          | 331     | 0       | 1.6380 | 0.1014  | 0.3364                              | 0.3378  | -0.3258 | 0.9984  | 0.9957 | 0.3194                   |    |     |     |
| 28, 31, 35, 38, 46-49, 54, 56, 58, 64                                              | 12                         | Adult ADHD                                | 0%                            | 0%      | 58.316% | 0.53629        | Yes             | 9047   | 0.9368            | 0.8673        | 1.0119        | -1.6588 | 0.0972        | -0.2576 | 12     | -18         | 0       | -1.1657 | 0.2437 | -1.1950 | 0.9114                              | -2.9812 | 0.5913  | -1.3112 | 0.1898 |                          |    |     |     |
| 28, 31, 35, 46-49, 54, 56, 58, 64                                                  | 11                         | Adult ADHD (Excl. Gizer)                  | 0%                            | 0%      | 60.229% | 0.50324        | Yes             | 8041   | 0.9278            | 0.8558        | 1.0058        | -1.8189 | 0.0689        | -0.2909 | 11     | -17         | 0       | -1.2456 | 0.2129 | -1.2117 | 0.9222                              | -3.0192 | 0.5959  | -1.3138 | 0.1889 |                          |    |     |     |
| 28, 31, 35, 46-48, 54, 58, 64                                                      | 9                          | Adult ADHD-EU                             | 0%                            | 0%      | 64.798% | 0.61714        | Yes             | 6423   | <b>0.8909</b>     | <b>0.8118</b> | <b>0.9777</b> | -2.4356 | <b>0.0149</b> | -0.2500 | 9      | -10         | 0       | -0.9383 | 0.3481 | -1.1460 | 0.9673                              | -3.0419 | 0.7499  | -1.1848 | 0.2361 |                          |    |     |     |
| 49, 56                                                                             | 2                          | Adult ADHD-Brazil                         | 0%                            | #NV     | #NV     | 0.81348        | Yes             | 1618   | 1.0511            | 0.8930        | 1.2371        | 0.5989  | 0.5492        | #NV     | #NV    | #NV         | #NV     | #NV     | #NV    | #NV     | #NV                                 | #NV     | #NV     | #NV     | #NV    |                          |    |     |     |
| 1-27, 29-30, 32-34, 36-37, 39-45, 50-53, 55, 57, 59-63, 65-71                      | 59                         | Children & Adolescent ADHD                | 51.045%                       | 33.93%  | 63.726% | 0              | Yes             | 31082  | <b>1.1050</b>     | <b>1.0203</b> | <b>1.1968</b> | 2.4545  | <b>0.0141</b> | 0.1356  | 59     | 233         | 0       | 1.5172  | 0.1292 | 0.3084  | 0.3569                              | -0.3911 | 1.0078  | 0.8641  | 0.3875 |                          |    |     |     |
| 1-2, 4-9, 11-15, 17, 19, 21-22, 24, 27, 34, 36-37, 39, 41-45, 50, 59, 62-63, 69-71 | 35                         | Children & Adolescent ADHD-Caucasian      | 48.545%                       | 23.743% | 65.28%  | <b>0.0008</b>  | Yes             | 23715  | <b>1.1102</b>     | <b>1.0225</b> | <b>1.2055</b> | 2.4885  | <b>0.0128</b> | 0.1546  | 35     | 93          | 0       | 1.3065  | 0.1914 | 0.3597  | 0.4937                              | -0.6079 | 1.3273  | 0.7286  | 0.4663 |                          |    |     |     |
| 1-2, 4-5, 7-9, 11, 14-15, 50, 69                                                   | 12                         | Children & Adolescent ADHD- North America | 55.367%                       | 14.633% | 76.664% | <b>0.01027</b> | Yes             | 6037   | 1.1069            | 0.8996        | 1.3620        | 0.9598  | 0.3372        | 0.2273  | 12     | 16          | 0       | 1.0286  | 0.3037 | 0.9838  | 1.0625                              | -1.0986 | 3.0661  | 0.9259  | 0.3545 |                          |    |     |     |
| 13, 17, 19, 21-22, 24, 27, 34, 36-37, 39, 41-45, 59, 62-63, 70-71                  | 21                         | Children & Adolescent ADHD- Europe        | 48.525%                       | 14.587% | 68.978% | <b>0.00695</b> | Yes             | 17141  | <b>1.1301</b>     | <b>1.0316</b> | <b>1.2379</b> | 2.6298  | <b>0.0085</b> | 0.1857  | 21     | 40          | 0       | 1.1777  | 0.2389 | 0.5349  | 0.6690                              | -0.7763 | 1.8461  | 0.7996  | 0.4240 |                          |    |     |     |
| 6,12, 18, 33, 53                                                                   | 5                          | Children & Adolescent ADHD- Middle East   | 0%                            | 0%      | 79.204% | 0.58547        | Yes             | 1081   | 0.9660            | 0.7902        | 1.1808        | -0.3381 | 0.7353        | -0.3000 | 5      | -4          | 0       | -0.7349 | 0.4624 | -2.9339 | 2.0409                              | -6.9340 | 1.0663  | -1.4375 | 0.1506 |                          |    |     |     |
| 10, 30, 40, 55, 60-61, 65                                                          | 7                          | Children & Adolescent ADHD- South America | 0%                            | 0%      | 70.809% | 0.6861         | Yes             | 2252   | 1.0573            | 0.8744        | 1.2785        | 0.5748  | 0.5654        | 0.1905  | 7      | 5           | 0       | 0.6008  | 0.5480 | 0.5248  | 0.8261                              | -1.0944 | 2.1440  | 0.6352  | 0.5253 |                          |    |     |     |
| 3, 16, 20, 23, 25-26, 29,32, 51-52, 57, 66-68                                      | 14                         | Children & Adolescent ADHD- Asia          | 71.666%                       | 51.39%  | 83.484% | <b>0.00001</b> | Yes             | 4571   | 1.2233            | 0.8233        | 1.8175        | 0.9977  | 0.3185        | 0.2418  | 14     | 23          | 0       | 1.2044  | 0.2284 | 2.0196  | 1.7415                              | -1.3937 | 5.4329  | 1.1597  | 0.2462 |                          |    |     |     |
| 3, 16, 20, 23, 25-26, 29,32, 57, 68                                                | 10                         | Children & Adolescent ADHD- Chinese       | 69.224%                       | 40.734% | 84.019% | <b>0.00059</b> | Yes             | 3829   | 1.1846            | 0.7620        | 1.8414        | 0.7525  | 0.4517        | 0.1778  | 10     | 9           | 0       | 0.7155  | 0.4743 | 1.4164  | 1.8866                              | -2.2813 | 5.1141  | 0.7508  | 0.4528 |                          |    |     |     |
| 51-52, 66-67                                                                       | 4                          | Children & Adolescent ADHD- Indo-Asia     | 81.934%                       | 53.245% | 93.02%  | <b>0.00085</b> | Yes             | 742    | 1.3567            | 0.4990        | 3.6886        | 0.5979  | 0.5499        | 0.5000  | 4      | 4           | 0       | 1.0191  | 0.3082 | 8.8778  | 6.6437                              | -4.1436 | 21.8991 | 1.3363  | 0.1815 |                          |    |     |     |
