# Supplementary material for: Association study and a systematic meta-analysis of the VNTR polymorphism in the 3′-UTR of dopamine transporter gene and attention-deficit hyperactivity disorder
Source: Springer Nature journal article supplement (doi:10.1007/s00702-019-01998-x), 2019-03-28
Supplement: MOESM3 [file 16581752]

**Supplementary Table S2** Summary statistics for meta-analysis of DAT1 3'-UTR VNTR Long-repeat allele as risk allele versus Short-repeat allele, in all ADHD samples as well as stratified by age or ethnicity. Including heterogeneity statistics, literature bias analysis followed by Trimm and Fill corrections.

| ID included                                                                        | Total no. Studies included | Definition                                | Heterogeneity statistics (I <sup>2</sup> ) |         |         |         | Synthesis model |        | Synthesis details |        |        |         |        |         |       | Begg's test |         |         |        |          | Egger's regression test (intercept) |          |         |          |         |        | Trim and fill correction |        |     |
|------------------------------------------------------------------------------------|----------------------------|-------------------------------------------|--------------------------------------------|---------|---------|---------|-----------------|--------|-------------------|--------|--------|---------|--------|---------|-------|-------------|---------|---------|--------|----------|-------------------------------------|----------|---------|----------|---------|--------|--------------------------|--------|-----|
|                                                                                    |                            |                                           | Estimate                                   | CI-     | CI+     | p-value | Fixed           | Random | N                 | OR     | ci-    | ci+     | z      | p       | tau b | k           | S (P-Q) | ties    | z      | p        | coef                                | se       | ci-     | ci+      | z       | p      | OR                       | ci-    | ci+ |
| 1-71                                                                               | 71                         | all ADHD                                  | 54.167%                                    | 40.029% | 64.972% | 0       | Yes             | 40681  | 1.1046            | 1.0309 | 1.1837 | 2.8217  | 0.0048 | 0.2016  | 71    | 502         | 4       | 2.4868  | 0.0129 | 0.8085   | 0.3583                              | 0.1062   | 1.5107  | 2.2565   | 0.0240  | 1.0614 | 1.0186                   | 1.1060 |     |
| 28, 31, 35, 38, 46-49, 54, 56, 58, 64                                              | 12                         | Adult ADHD                                | 0%                                         | 0%      | 58.316% | 0.66306 | Yes             | 9224   | 0.9618            | 0.8907 | 1.0387 | -0.9920 | 0.3212 | -0.0152 | 12    | 0           | 0       | -0.0686 | 0.9453 | -0.0782  | 0.9275                              | -1.8961  | 1.7397  | -0.0843  | 0.9328  |        |                          |        |     |
| 28, 31, 35, 46-49, 54, 56, 58, 64                                                  | 11                         | Adult ADHD (Excl. Gizer)                  | 0%                                         | 0%      | 60.229% | 0.60818 | Yes             | 8218   | 0.9551            | 0.8813 | 1.0351 | -1.1202 | 0.2627 | -0.0919 | 0.96  | -1.9697     | 1.79    | -0.0959 | 0.9236 | 0        | 11                                  | -1       | 0       | 0        | 1       |        |                          |        |     |
| 28, 31, 35, 46-48, 54, 58, 64                                                      | 9                          | Adult ADHD-EU                             | 0%                                         | 0%      | 64.798% | 0.67386 | Yes             | 6574   | 0.9227            | 0.8413 | 1.0121 | -1.7050 | 0.0882 | -0.0278 | 9     | -2          | 0       | -0.1043 | 0.9170 | 0.06691  | 1.03432                             | -1.96032 | 2.09414 | 0.06469  | 0.94842 |        |                          |        |     |
| 49, 56                                                                             | 2                          | Adult ADHD-Brazil                         | 0%                                         | #NV     | #NV     | 0.61602 | Yes             | 1644   | 1.0635            | 0.9032 | 1.2522 | 0.7386  | 0.4601 | #NV     | #NV   | #NV         | #NV     | #NV     | #NV    | #NV      | #NV                                 | #NV      | #NV     | #NV      |         |        |                          |        |     |
| 1-27, 29-30, 32-34, 36-37, 39-45, 50, 53, 55, 57, 59-63, 65-71                     | 59                         | Children & Adolescent ADHD                | 56.286%                                    | 41.498% | 67.335% | 0       | Yes             | 31457  | 1.1602            | 1.0657 | 1.2631 | 3.4261  | 0.0006 | 0.2075  | 59    | 356         | 4       | 2.3215  | 0.0203 | 0.7188   | 0.3901                              | -0.0458  | 1.4833  | 1.8427   | 0.0654  | 1.1053 | 1.0528                   | 1.1605 |     |
| 1-2, 4-9, 11-15, 17, 19, 21-22, 24, 27, 34, 36-37, 39, 41-45, 50, 59, 62-63, 69-71 | 35                         | Children & Adolescent ADHD- Caucasian     | 58.517%                                    | 39.736% | 71.445% | 0.00001 | Yes             | 23765  | 1.1310            | 1.0282 | 1.2441 | 2.5309  | 0.0114 | 0.1210  | 35    | 73          | 0       | 1.0225  | 0.3065 | 0.46622  | 0.56504                             | -0.64123 | 1.57367 | 0.82511  | 0.40931 |        |                          |        |     |
| 1-2, 4-5, 7-9, 11, 14-15, 50, 69                                                   | 12                         | Children & Adolescent ADHD- North America | 55.107%                                    | 14.073% | 76.546% | 0.01077 | Yes             | 6037   | 1.1146            | 0.8995 | 1.3811 | 0.9919  | 0.3213 | 0.2273  | 12    | 16          | 0       | 1.0286  | 0.3037 | 0.95126  | 1.08017                             | -1.16584 | 3.06835 | 0.88066  | 0.3785  |        |                          |        |     |
| 13, 17, 19, 21-22, 24, 27, 34, 36-37, 39, 41-45, 59, 62-63, 70, 71                 | 21                         | Children & Adolescent ADHD- Europe        | 62.116%                                    | 39.264% | 76.37%  | 0.00009 | Yes             | 17191  | 1.1661            | 1.0448 | 1.3015 | 2.7417  | 0.0061 | 0.1381  | 21    | 30          | 0       | 0.8757  | 0.3812 | 0.97244  | 0.80716                             | -0.60957 | 2.55445 | 1.20477  | 0.22829 |        |                          |        |     |
| 6, 12, 18, 33, 53                                                                  | 5                          | Children & Adolescent ADHD- Middle East   | 59.255%                                    | 0%      | 84.794% | 0.04362 | Yes             | 1249   | 1.0742            | 0.7856 | 1.4689 | 0.4486  | 0.6538 | -0.1000 | 5     | -2          | 0       | -0.2450 | 0.8065 | -2.36579 | 4.34956                             | -10.8908 | 6.15918 | -0.54392 | 0.5865  |        |                          |        |     |
| 10, 30, 40, 55, 60-61, 65                                                          | 7                          | Children & Adolescent ADHD- South America | 0%                                         | 0%      | 70.809% | 0.6861  | Yes             | 2252   | 1.0573            | 0.8744 | 1.2785 | 0.5748  | 0.5654 | 0.1905  | 7     | 5           | 0       | 0.6008  | 0.5480 | 0.52479  | 0.82614                             | -1.09442 | 2.144   | 0.63523  | 0.52528 |        |                          |        |     |
| 3, 16, 20, 23, 25-26, 29, 32, 51-52, 57, 66, 68                                    | 14                         | Children & Adolescent ADHD- Asia          | 66.817%                                    | 41.829% | 81.071% | 0.00019 | Yes             | 4728   | 1.4266            | 1.0211 | 1.9932 | 2.0823  | 0.0373 | 0.4176  | 14    | 39          | 0       | 2.0803  | 0.0375 | 2.57856  | 1.26416                             | 0.10086  | 5.05627 | 2.03975  | 0.04138 | 1.0991 | 0.9240                   | 1.3074 |     |
| 3, 16, 20, 23, 25-26, 29, 32, 57, 68                                               | 10                         | Children & Adolescent ADHD- Chinese       | 66.662%                                    | 35.004% | 82.9%   | 0.0014  | Yes             | 3973   | 1.3376            | 0.8819 | 2.0290 | 1.3685  | 0.1712 | 0.4444  | 10    | 21          | 0       | 1.7889  | 0.0736 | 2.03517  | 1.51111                             | -0.92655 | 4.9969  | 1.34681  | 0.17804 |        |                          |        |     |
| 51-52, 66-67                                                                       | 4                          | Children & Adolescent ADHD- Indo-Asia     | 74.05%                                     | 27.469% | 90.715% | 0.00905 | Yes             | 755    | 1.6863            | 0.8809 | 3.2281 | 1.5773  | 0.1147 | 0.8333  | 4     | 6           | 0       | 1.6984  | 0.0894 | 5.55301  | 2.19083                             | 1.25906  | 9.84697 | 2.53466  | 0.01126 | 1.0803 | 0.8184                   | 1.4261 |     |
